# Supplementary material for: Carbon, nitrogen and sulfur (CNS) status and dynamics in Amazon basin upland soils, Brazil
Source: Copernicus journal article supplement (doi:10.5194/soil-2019-16), 2019-04-15
Supplement: Supplementary file 1 [file ERA_CNS_all-data.xlsx]

## Sheet: Tabelle1
Site	Land use	F - PF	Location	WSG 84 - S	WSG 84 - W	Regional	Phase	Level	Ctot	Corg	Ntot	Stot	pHH2O	pHCaCl2	el.Cond.	Munsell code	Mundell description	Sand (%)	Silt (%)	Clay (%)	Classification
110	Brazil nut	PF	Itacoatiara	03°00'57.2"	058°49'59.4	Central	Ph_01	ORG	47.1	45.1	1.35	0.276	NA	NA	NA	NA	NA	NA	NA	NA	NA
120	Forest	F	Itacoatiara	03°00'57.2"	058°49'59.4	Central	Ph_01	ORG	47.2	46.3	1.63	0.231	NA	NA	NA	NA	NA	NA	NA	NA	NA
210	Forest	F	Rio Preto da Eva	02°31'59.4"	060°01'24.7"	Central	Ph_01	ORG	31.1	29	1.3	0.166	NA	NA	NA	NA	NA	NA	NA	NA	NA
220	Forest	F	Rio Preto da Eva	02°31'59.4"	060°01'24.7"	Central	Ph_01	ORG	27.3	27	1.01	0.121	NA	NA	NA	NA	NA	NA	NA	NA	NA
310	Rubber tree	PF	Manaus Embrapa	02°53'24.4"	059°58'11.9"	Central	Ph_01	ORG	NA	NA	NA	NA	NA	NA	NA	NA	NA	NA	NA	NA	NA
320	Forest	F	Manaus Embrapa	02°53'24.4"	059°58'11.9"	Central	Ph_01	ORG	NA	NA	NA	NA	NA	NA	NA	NA	NA	NA	NA	NA	NA
410	Jacareuba	PF	Manaus Ducke	02°54'47.0"	059°58'47.5"	Central	Ph_01	ORG	NA	NA	NA	NA	NA	NA	NA	NA	NA	NA	NA	NA	NA
420	Forest	F	Manaus Ducke	02°54'47.0"	059°58'47.5"	Central	Ph_01	ORG	NA	NA	NA	NA	NA	NA	NA	NA	NA	NA	NA	NA	NA
430	Forest	F	Manaus Ducke	02°54'47.0"	059°58'47.5"	Central	Ph_01	ORG	NA	NA	NA	NA	NA	NA	NA	NA	NA	NA	NA	NA	NA
510	Orange	PF	Iranduba	03°15'17.4"	060°13'35.4"	Central	Ph_01	ORG	41.5	39.9	2.03	0.228	NA	NA	NA	NA	NA	NA	NA	NA	NA
520	Forest TPI	F	Iranduba	03°15'17.4"	060°13'35.4"	Central	Ph_01	ORG	41.6	38.6	1.26	0.183	NA	NA	NA	NA	NA	NA	NA	NA	NA
530	Forest	F	Iranduba	03°15'17.4"	060°13'35.4"	Central	Ph_01	ORG	31.3	29.4	1.48	0.181	NA	NA	NA	NA	NA	NA	NA	NA	NA
610	Orange	PF	Manacapuru	03°16'44.0"	060°30'08.2"	Central	Ph_01	ORG	42	39	2.19	0.201	NA	NA	NA	NA	NA	NA	NA	NA	NA
620	Brazil nut	PF	Manacapuru	03°16'44.0"	060°30'08.2"	Central	Ph_01	ORG	45.9	44.5	1.28	0.203	NA	NA	NA	NA	NA	NA	NA	NA	NA
630	Forest	F	Manacapuru	03°16'44.0"	060°30'08.2"	Central	Ph_01	ORG	NA	NA	NA	NA	NA	NA	NA	NA	NA	NA	NA	NA	NA
710	Pasture	PF	Apui_01	07°10'47.1"	059°43'45.1"	South	Ph_01	ORG	39.6	36.1	1.43	0.166	NA	NA	NA	NA	NA	NA	NA	NA	NA
720	Forest	F	Apui_01	07°10'47.1"	059°43'45.1"	South	Ph_01	ORG	38.6	33.7	1.79	0.198	NA	NA	NA	NA	NA	NA	NA	NA	NA
810	Pasture	PF	Apui_02	07°13'01.2"	059°49'58.3"	South	Ph_01	ORG	37.8	33	0.62	0.108	NA	NA	NA	NA	NA	NA	NA	NA	NA
820	Forest	F	Apui_02	07°13'01.2"	059°49'58.3"	South	Ph_01	ORG	37	36.1	1.85	0.188	NA	NA	NA	NA	NA	NA	NA	NA	NA
910	Acai	PF	Humaita	07°48'41.2"	063°11'06.4"	South	Ph_01	ORG	40.4	37.4	1.28	0.15	NA	NA	NA	NA	NA	NA	NA	NA	NA
920	Forest	F	Humaita	07°48'41.2"	063°11'06.4"	South	Ph_01	ORG	38.5	36.8	1.95	0.168	NA	NA	NA	NA	NA	NA	NA	NA	NA
1010	Manioc	PF	Labrea	07°14'17.0"	064°43'40.4"	South	Ph_01	ORG	41.4	35.6	1.31	0.142	NA	NA	NA	NA	NA	NA	NA	NA	NA
1020	Forest	F	Labrea	07°14'17.0"	064°43'40.4"	South	Ph_01	ORG	40.8	38.8	1.34	0.149	NA	NA	NA	NA	NA	NA	NA	NA	NA
1110	Eucalypt	PF	Porto Velho	08°41'03.0"	064°01'09.3"	South	Ph_01	ORG	46.3	43.4	0.59	0.089	NA	NA	NA	NA	NA	NA	NA	NA	NA
1120	Forest	F	Porto Velho	08°41'03.0"	064°01'09.3"	South	Ph_01	ORG	46.5	45	1.33	0.13	NA	NA	NA	NA	NA	NA	NA	NA	NA
1210	Corn	PF	Nova California	09°45'06.8"	066°41'11.5"	South	Ph_01	ORG	40.8	37.3	1.86	0.172	NA	NA	NA	NA	NA	NA	NA	NA	NA
1220	Forest	F	Nova California	09°45'06.8"	066°41'11.5"	South	Ph_01	ORG	40.1	37.6	1.9	0.186	NA	NA	NA	NA	NA	NA	NA	NA	NA
1310	Pasture	PF	Boca do Acre	09°00'45.6"	067°12'29.0"	South	Ph_01	ORG	42.4	39.3	0.54	0.09	NA	NA	NA	NA	NA	NA	NA	NA	NA
1320	Forest	F	Boca do Acre	09°00'45.6"	067°12'29.0"	South	Ph_01	ORG	41.1	38	1.93	0.173	NA	NA	NA	NA	NA	NA	NA	NA	NA
110	Brazil nut	PF	Itacoatiara	03°00'57.2"	058°49'59.4	Central	Ph_02	ORG	49.1	NA	1.3	0.196	NA	NA	NA	NA	NA	NA	NA	NA	NA
120	Forest	F	Itacoatiara	03°00'57.2"	058°49'59.4	Central	Ph_02	ORG	44.3	NA	1.7	0.181	NA	NA	NA	NA	NA	NA	NA	NA	NA
210	Forest	F	Rio Preto da Eva	02°31'59.4"	060°01'24.7"	Central	Ph_02	ORG	44.5	NA	1.35	0.158	NA	NA	NA	NA	NA	NA	NA	NA	NA
220	Forest	F	Rio Preto da Eva	02°31'59.4"	060°01'24.7"	Central	Ph_02	ORG	41.8	NA	1.33	0.152	NA	NA	NA	NA	NA	NA	NA	NA	NA
310	Rubber tree	PF	Manaus Embrapa	02°53'24.4"	059°58'11.9"	Central	Ph_02	ORG	42.2	NA	1.62	0.167	NA	NA	NA	NA	NA	NA	NA	NA	NA
320	Forest	F	Manaus Embrapa	02°53'24.4"	059°58'11.9"	Central	Ph_02	ORG	39	NA	1.59	0.17	NA	NA	NA	NA	NA	NA	NA	NA	NA
410	Forest	F	Manaus Ducke	02°54'47.0"	059°58'47.5"	Central	Ph_02	ORG	44.9	NA	1.3	0.159	NA	NA	NA	NA	NA	NA	NA	NA	NA
420	Forest	F	Manaus Ducke	02°54'47.0"	059°58'47.5"	Central	Ph_02	ORG	41.5	NA	1.54	0.186	NA	NA	NA	NA	NA	NA	NA	NA	NA
430	Tree plant.	PF	Manaus Ducke	02°54'47.0"	059°58'47.5"	Central	Ph_02	ORG	44.4	NA	1.57	0.174	NA	NA	NA	NA	NA	NA	NA	NA	NA
510	Orange	PF	Iranduba	03°15'17.4"	060°13'35.4"	Central	Ph_02	ORG	41.1	NA	1.59	0.191	NA	NA	NA	NA	NA	NA	NA	NA	NA
520	Forest TPI	F	Iranduba	03°15'17.4"	060°13'35.4"	Central	Ph_02	ORG	30.1	NA	1.15	0.131	NA	NA	NA	NA	NA	NA	NA	NA	NA
530	Forest	F	Iranduba	03°15'17.4"	060°13'35.4"	Central	Ph_02	ORG	NA	NA	NA	NA	NA	NA	NA	NA	NA	NA	NA	NA	NA
610	Orange	PF	Manacapuru	03°16'44.0"	060°30'08.2"	Central	Ph_02	ORG	39.4	NA	2.38	0.271	NA	NA	NA	NA	NA	NA	NA	NA	NA
620	Brazil nut	PF	Manacapuru	03°16'44.0"	060°30'08.2"	Central	Ph_02	ORG	40.1	NA	1.3	0.182	NA	NA	NA	NA	NA	NA	NA	NA	NA
630	Forest	F	Manacapuru	03°16'44.0"	060°30'08.2"	Central	Ph_02	ORG	34.5	NA	1.43	0.137	NA	NA	NA	NA	NA	NA	NA	NA	NA
710	Pasture	PF	Apui_01	07°10'47.1"	059°43'45.1"	South	Ph_02	ORG	47.5	NA	1.6	0.214	NA	NA	NA	NA	NA	NA	NA	NA	NA
720	Forest	F	Apui_01	07°10'47.1"	059°43'45.1"	South	Ph_02	ORG	40.9	NA	0.9	0.152	NA	NA	NA	NA	NA	NA	NA	NA	NA
810	Pasture	PF	Apui_02	07°13'01.2"	059°49'58.3"	South	Ph_02	ORG	38	NA	0.62	0.094	NA	NA	NA	NA	NA	NA	NA	NA	NA
820	Forest	F	Apui_02	07°13'01.2"	059°49'58.3"	South	Ph_02	ORG	44.5	NA	1.84	0.184	NA	NA	NA	NA	NA	NA	NA	NA	NA
910	Acai	PF	Humaita	07°48'41.2"	063°11'06.4"	South	Ph_02	ORG	39.6	NA	1.07	0.129	NA	NA	NA	NA	NA	NA	NA	NA	NA
920	Forest	F	Humaita	07°48'41.2"	063°11'06.4"	South	Ph_02	ORG	47.5	NA	1.46	0.12	NA	NA	NA	NA	NA	NA	NA	NA	NA
1010	Manioc	PF	Labrea	07°14'17.0"	064°43'40.4"	South	Ph_02	ORG	40.4	NA	1.11	0.117	NA	NA	NA	NA	NA	NA	NA	NA	NA
1020	Forest	F	Labrea	07°14'17.0"	064°43'40.4"	South	Ph_02	ORG	NA	NA	NA	NA	NA	NA	NA	NA	NA	NA	NA	NA	NA
1110	Eucalypt	PF	Porto Velho	08°41'03.0"	064°01'09.3"	South	Ph_02	ORG	43.9	NA	0.72	0.098	NA	NA	NA	NA	NA	NA	NA	NA	NA
1120	Forest	F	Porto Velho	08°41'03.0"	064°01'09.3"	South	Ph_02	ORG	40.1	NA	1.52	0.212	NA	NA	NA	NA	NA	NA	NA	NA	NA
1210	Corn	PF	Nova California	09°45'06.8"	066°41'11.5"	South	Ph_02	ORG	42.9	NA	0.96	0.128	NA	NA	NA	NA	NA	NA	NA	NA	NA
1220	Forest	F	Nova California	09°45'06.8"	066°41'11.5"	South	Ph_02	ORG	38.3	NA	1.53	0.166	NA	NA	NA	NA	NA	NA	NA	NA	NA
1310	Pasture	PF	Boca do Acre	09°00'45.6"	067°12'29.0"	South	Ph_02	ORG	40.8	NA	0.71	0.106	NA	NA	NA	NA	NA	NA	NA	NA	NA
1320	Forest	F	Boca do Acre	09°00'45.6"	067°12'29.0"	South	Ph_02	ORG	40.2	NA	1.94	0.156	NA	NA	NA	NA	NA	NA	NA	NA	NA
110	Brazil nut	PF	Itacoatiara	03°00'57.2"	058°49'59.4	Central	Ph_03	ORG	49.6	NA	1.34	0.22	NA	NA	NA	NA	NA	NA	NA	NA	NA
120	Forest	F	Itacoatiara	03°00'57.2"	058°49'59.4	Central	Ph_03	ORG	48.4	NA	1.8	0.197	NA	NA	NA	NA	NA	NA	NA	NA	NA
210	Forest	F	Rio Preto da Eva	02°31'59.4"	060°01'24.7"	Central	Ph_03	ORG	45.9	NA	1.4	0.193	NA	NA	NA	NA	NA	NA	NA	NA	NA
220	Forest	F	Rio Preto da Eva	02°31'59.4"	060°01'24.7"	Central	Ph_03	ORG	43.9	NA	1.38	0.153	NA	NA	NA	NA	NA	NA	NA	NA	NA
310	Rubber tree	PF	Manaus Embrapa	02°53'24.4"	059°58'11.9"	Central	Ph_03	ORG	47.3	NA	2	0.204	NA	NA	NA	NA	NA	NA	NA	NA	NA
320	Forest	F	Manaus Embrapa	02°53'24.4"	059°58'11.9"	Central	Ph_03	ORG	47	NA	1.94	0.199	NA	NA	NA	NA	NA	NA	NA	NA	NA
410	Forest	F	Manaus Ducke	02°54'47.0"	059°58'47.5"	Central	Ph_03	ORG	49.6	NA	1.28	0.166	NA	NA	NA	NA	NA	NA	NA	NA	NA
420	Forest	F	Manaus Ducke	02°54'47.0"	059°58'47.5"	Central	Ph_03	ORG	46.6	NA	1.77	0.194	NA	NA	NA	NA	NA	NA	NA	NA	NA
430	Tree plant.	PF	Manaus Ducke	02°54'47.0"	059°58'47.5"	Central	Ph_03	ORG	48.6	NA	1.81	0.178	NA	NA	NA	NA	NA	NA	NA	NA	NA
510	Orange	PF	Iranduba	03°15'17.4"	060°13'35.4"	Central	Ph_03	ORG	44	NA	2.2	0.233	NA	NA	NA	NA	NA	NA	NA	NA	NA
520	Forest TPI	F	Iranduba	03°15'17.4"	060°13'35.4"	Central	Ph_03	ORG	41.3	NA	1.47	0.162	NA	NA	NA	NA	NA	NA	NA	NA	NA
530	Forest	F	Iranduba	03°15'17.4"	060°13'35.4"	Central	Ph_03	ORG	37.5	NA	1.8	0.172	NA	NA	NA	NA	NA	NA	NA	NA	NA
610	Orange	PF	Manacapuru	03°16'44.0"	060°30'08.2"	Central	Ph_03	ORG	42.6	NA	2.36	0.216	NA	NA	NA	NA	NA	NA	NA	NA	NA
620	Brazil nut	PF	Manacapuru	03°16'44.0"	060°30'08.2"	Central	Ph_03	ORG	48.1	NA	1.52	0.234	NA	NA	NA	NA	NA	NA	NA	NA	NA
630	Forest	F	Manacapuru	03°16'44.0"	060°30'08.2"	Central	Ph_03	ORG	44.1	NA	1.77	0.158	NA	NA	NA	NA	NA	NA	NA	NA	NA
710	Pasture	PF	Apui_01	07°10'47.1"	059°43'45.1"	South	Ph_03	ORG	43.5	NA	1.07	0.113	NA	NA	NA	NA	NA	NA	NA	NA	NA
720	Forest	F	Apui_01	07°10'47.1"	059°43'45.1"	South	Ph_03	ORG	46.5	NA	1.8	0.179	NA	NA	NA	NA	NA	NA	NA	NA	NA
810	Pasture	PF	Apui_02	07°13'01.2"	059°49'58.3"	South	Ph_03	ORG	NA	NA	NA	NA	NA	NA	NA	NA	NA	NA	NA	NA	NA
820	Forest	F	Apui_02	07°13'01.2"	059°49'58.3"	South	Ph_03	ORG	NA	NA	NA	NA	NA	NA	NA	NA	NA	NA	NA	NA	NA
910	Acai	PF	Humaita	07°48'41.2"	063°11'06.4"	South	Ph_03	ORG	42.3	NA	1.35	0.161	NA	NA	NA	NA	NA	NA	NA	NA	NA
920	Forest	F	Humaita	07°48'41.2"	063°11'06.4"	South	Ph_03	ORG	44.9	NA	1.99	0.203	NA	NA	NA	NA	NA	NA	NA	NA	NA
1010	Manioc	PF	Labrea	07°14'17.0"	064°43'40.4"	South	Ph_03	ORG	NA	NA	NA	NA	NA	NA	NA	NA	NA	NA	NA	NA	NA
1020	Forest	F	Labrea	07°14'17.0"	064°43'40.4"	South	Ph_03	ORG	NA	NA	NA	NA	NA	NA	NA	NA	NA	NA	NA	NA	NA
1110	Eucalypt	PF	Porto Velho	08°41'03.0"	064°01'09.3"	South	Ph_03	ORG	49.2	NA	0.81	0.094	NA	NA	NA	NA	NA	NA	NA	NA	NA
1120	Forest	F	Porto Velho	08°41'03.0"	064°01'09.3"	South	Ph_03	ORG	47.4	NA	1.46	0.153	NA	NA	NA	NA	NA	NA	NA	NA	NA
1210	Corn	PF	Nova California	09°45'06.8"	066°41'11.5"	South	Ph_03	ORG	39.1	NA	1.4	0.184	NA	NA	NA	NA	NA	NA	NA	NA	NA
1220	Forest	F	Nova California	09°45'06.8"	066°41'11.5"	South	Ph_03	ORG	43	NA	2.3	0.176	NA	NA	NA	NA	NA	NA	NA	NA	NA
1310	Pasture	PF	Boca do Acre	09°00'45.6"	067°12'29.0"	South	Ph_03	ORG	43	NA	2.02	0.217	NA	NA	NA	NA	NA	NA	NA	NA	NA
1320	Forest	F	Boca do Acre	09°00'45.6"	067°12'29.0"	South	Ph_03	ORG	39.6	NA	1.86	0.171	NA	NA	NA	NA	NA	NA	NA	NA	NA
110	Brazil nut	PF	Itacoatiara	03°00'57.2"	058°49'59.4	Central	Ph_01	TOP	2.12	1.67	0.151	0.043	4.41	3.77	36	10YR 7/3,5	very pale brown	10.63	19.27	70.1	very clayey
120	Forest	F	Itacoatiara	03°00'57.2"	058°49'59.4	Central	Ph_01	TOP	2.56	1.95	0.179	0.045	4.09	3.67	86.1	6,25YR 7/3	very pale brown/pole yellow	10	23.85	66.15	very clayey
210	Forest	F	Rio Preto da Eva	02°31'59.4"	060°01'24.7"	Central	Ph_01	TOP	2.11	1.46	0.167	0.038	4.31	3.84	54.8	2,5YR 8/2,5	pale yellow	15.6	26.05	58.35	clayey
220	Forest	F	Rio Preto da Eva	02°31'59.4"	060°01'24.7"	Central	Ph_01	TOP	2.6	1.89	0.202	0.036	4.88	3.92	42.8	10YR 7/2	light grey	12.72	27.18	60.1	clayey
310	Rubber tree	PF	Manaus Embrapa	02°53'24.4"	059°58'11.9"	Central	Ph_01	TOP	1.91	1.65	0.173	0.051	NA	NA	NA	NA	NA	NA	NA	NA	NA
320	Forest	F	Manaus Embrapa	02°53'24.4"	059°58'11.9"	Central	Ph_01	TOP	2.11	1.78	0.183	0.045	NA	NA	NA	NA	NA	NA	NA	NA	NA
410	Jacareuba	PF	Manaus Ducke	02°54'47.0"	059°58'47.5"	Central	Ph_01	TOP	NA	NA	NA	NA	NA	NA	NA	NA	NA	NA	NA	NA	NA
420	Forest	F	Manaus Ducke	02°54'47.0"	059°58'47.5"	Central	Ph_01	TOP	1.87	1.7	0.145	0.037	NA	NA	NA	NA	NA	NA	NA	NA	NA
430	Forest	F	Manaus Ducke	02°54'47.0"	059°58'47.5"	Central	Ph_01	TOP	NA	NA	NA	NA	NA	NA	NA	NA	NA	NA	NA	NA	NA
510	Orange	PF	Iranduba	03°15'17.4"	060°13'35.4"	Central	Ph_01	TOP	1.46	1.23	0.103	0.023	5.02	4.14	32.1	10YR 4/2	dark greyish brown	64.56	9.09	26.35	sandy clay loam
520	Forest TPI	F	Iranduba	03°15'17.4"	060°13'35.4"	Central	Ph_01	TOP	2.19	1.93	0.167	0.033	5.73	4.91	45	10YR 4/3,5	dark yellowish brown	43.37	13.23	43.4	clayey
530	Forest	F	Iranduba	03°15'17.4"	060°13'35.4"	Central	Ph_01	TOP	1.63	1.15	0.111	0.024	4.32	3.9	48.9	10YR 4,5/4	dark brown/yellowish brown	60.39	7.81	31.8	sandy clay loam
610	Orange	PF	Manacapuru	03°16'44.0"	060°30'08.2"	Central	Ph_01	TOP	1.7	1.33	0.136	0.03	4.98	4.22	55.8	10YR 5/6	yellowish brown	28.83	45.07	26.1	clay-loam to loamy
620	Brazil nut	PF	Manacapuru	03°16'44.0"	060°30'08.2"	Central	Ph_01	TOP	1.8	1.38	0.142	0.028	4.36	3.78	42.5	10YR 5/8	yellowish brown	25.39	48.41	26.2	clay-loam to loamy
630	Forest	F	Manacapuru	03°16'44.0"	060°30'08.2"	Central	Ph_01	TOP	2.45	1.86	0.175	0.026	4.32	3.85	49.7	10YR 5/6	yellowish brown	20.44	55.66	23.9	silty loam
710	Pasture	PF	Apui_01	07°10'47.1"	059°43'45.1"	South	Ph_01	TOP	1.52	0.99	0.119	0.032	4.84	4	51.6	6,25YR 5/7	yellowish red/strong brown	25.32	17.63	57.05	clayey
720	Forest	F	Apui_01	07°10'47.1"	059°43'45.1"	South	Ph_01	TOP	2.25	1.6	0.182	0.046	4.3	3.71	55.7	6,25YR 5/8	yellowish red/strong brown	12.56	17.84	69.9	clayey
810	Pasture	PF	Apui_02	07°13'01.2"	059°49'58.3"	South	Ph_01	TOP	2.54	1.89	0.17	0.035	4.92	4.03	27.8	10YR 6/8	brownish yellow	18.91	20.99	60.1	very clayey
820	Forest	F	Apui_02	07°13'01.2"	059°49'58.3"	South	Ph_01	TOP	1.45	1.01	0.127	0.024	4.23	3.81	43.8	10YR 6/7	brownish yellow	49.4	13.2	37.4	sandy clay
910	Acai	PF	Humaita	07°48'41.2"	063°11'06.4"	South	Ph_01	TOP	1.11	0.92	0.115	0.016	4.86	3.94	31.6	10YR 6/6	brownish yellow	12.67	62.73	24.6	silty loam
920	Forest	F	Humaita	07°48'41.2"	063°11'06.4"	South	Ph_01	TOP	1.2	0.88	0.139	0.017	4.67	3.8	23.6	10YR 6/6	brownish yellow	9.88	63.32	26.8	silty loam
1010	Manioc	PF	Labrea	07°14'17.0"	064°43'40.4"	South	Ph_01	TOP	1.54	1.29	0.134	0.018	4.59	3.7	27.9	10YR 5/7	yellowish brown	22.84	57.46	19.7	silty loam
1020	Forest	F	Labrea	07°14'17.0"	064°43'40.4"	South	Ph_01	TOP	1.36	0.98	0.128	0.018	4.39	3.71	27.7	10YR 6/6	brownish yellow	18.09	60.71	21.2	silty loam
1110	Eucalypt	PF	Porto Velho	08°41'03.0"	064°01'09.3"	South	Ph_01	TOP	1.33	1.01	0.101	0.014	5.42	4.47	27	10YR 5/6	yellowish brown	24.39	53.11	22.5	silty loam
1120	Forest	F	Porto Velho	08°41'03.0"	064°01'09.3"	South	Ph_01	TOP	2.14	1.73	0.151	0.021	4.08	3.57	54.8	10YR 5,5/6	brownish yellow/yellowish brown	19.37	63.13	17.5	silty loam
1210	Corn	PF	Nova California	09°45'06.8"	066°41'11.5"	South	Ph_01	TOP	1.51	1.2	0.136	0.027	5.14	4.19	29.7	8,75YR 5/8	strong brown/yellowish brown	27.56	29.84	42.6	clayey
1220	Forest	F	Nova California	09°45'06.8"	066°41'11.5"	South	Ph_01	TOP	1.61	1.25	0.157	0.029	4.72	4.06	69.4	8,75YR 5/8	strong brown/yellowish brown	29.01	28.24	42.75	clayey
1310	Pasture	PF	Boca do Acre	09°00'45.6"	067°12'29.0"	South	Ph_01	TOP	1.92	1.57	0.178	0.027	5.09	4.1	25.2	10YR 5/7	yellowish brown	22.55	44.35	33.1	clayey loam
1320	Forest	F	Boca do Acre	09°00'45.6"	067°12'29.0"	South	Ph_01	TOP	1.02	0.81	0.088	0.017	4.17	3.68	34.7	10YR 5/8	yellowish brown	62.28	29.87	7.85	sandy loam
110	Brazil nut	PF	Itacoatiara	03°00'57.2"	058°49'59.4	Central	Ph_02	TOP	2.5	1.98	0.163	0.0311	4.13	3.72	73.2	10YR 6,5/4	pale brown/light yellowish brown	NA	NA	NA	NA
120	Forest	F	Itacoatiara	03°00'57.2"	058°49'59.4	Central	Ph_02	TOP	2.62	2.07	0.176	0.033	4.26	3.67	90.4	10YR 6,5/4	pale brown/light yellowish brown	NA	NA	NA	NA
210	Forest	F	Rio Preto da Eva	02°31'59.4"	060°01'24.7"	Central	Ph_02	TOP	2.17	1.76	0.165	0.029	4.22	3.82	86.2	2,5Y 6/3	light yellowish brown	NA	NA	NA	NA
220	Forest	F	Rio Preto da Eva	02°31'59.4"	060°01'24.7"	Central	Ph_02	TOP	2.58	2.07	0.201	0.029	4.67	3.81	57.9	10YR 7/4	very pale brown	NA	NA	NA	NA
310	Rubber tree	PF	Manaus Embrapa	02°53'24.4"	059°58'11.9"	Central	Ph_02	TOP	3.1	2.74	0.213	0.035	4.14	3.76	84.1	2,5Y 6/3	light yellowish brown	NA	NA	NA	NA
320	Forest	F	Manaus Embrapa	02°53'24.4"	059°58'11.9"	Central	Ph_02	TOP	2.75	2.14	0.213	0.04	4.14	3.6	79.3	10YR 6/4	light yellowish brown	NA	NA	NA	NA
410	Forest	F	Manaus Ducke	02°54'47.0"	059°58'47.5"	Central	Ph_02	TOP	2.46	1.95	0.168	0.028	4.09	3.66	52.7	10YR 6/3	pale brown	NA	NA	NA	NA
420	Forest	F	Manaus Ducke	02°54'47.0"	059°58'47.5"	Central	Ph_02	TOP	3.29	2.56	0.227	0.037	3.94	3.54	100.1	10YR 6,5/3	very pale brown/pale brown	NA	NA	NA	NA
430	Tree plant.	PF	Manaus Ducke	02°54'47.0"	059°58'47.5"	Central	Ph_02	TOP	2.22	1.76	0.165	0.03	3.99	3.66	78.3	10YR 7/4	very pale brown	NA	NA	NA	NA
510	Orange	PF	Iranduba	03°15'17.4"	060°13'35.4"	Central	Ph_02	TOP	1.52	1.22	0.118	0.022	4.83	4.24	70.4	10YR 4/3	brown	NA	NA	NA	NA
520	Forest TPI	F	Iranduba	03°15'17.4"	060°13'35.4"	Central	Ph_02	TOP	2.5	1.96	0.184	0.029	5.58	4.94	47.1	10YR 4/2	dark greyish brown	NA	NA	NA	NA
530	Forest	F	Iranduba	03°15'17.4"	060°13'35.4"	Central	Ph_02	TOP	1.55	1.12	0.12	0.02	3.99	3.72	81.4	10YR 4/	dark yellowish brown	NA	NA	NA	NA
610	Orange	PF	Manacapuru	03°16'44.0"	060°30'08.2"	Central	Ph_02	TOP	1.87	1.51	0.137	0.021	4.37	3.94	50.2	10YR 5/6	yellowish brown	NA	NA	NA	NA
620	Brazil nut	PF	Manacapuru	03°16'44.0"	060°30'08.2"	Central	Ph_02	TOP	2.01	1.57	0.154	0.02	4.32	3.81	46.3	10YR 5/8	yellowish brown	NA	NA	NA	NA
630	Forest	F	Manacapuru	03°16'44.0"	060°30'08.2"	Central	Ph_02	TOP	2.7	1.89	0.202	0.022	4.11	3.82	97	10YR 5/7	yellowish brown	NA	NA	NA	NA
710	Pasture	PF	Apui_01	07°10'47.1"	059°43'45.1"	South	Ph_02	TOP	1.9	1.38	0.13	0.03	5.41	4.33	55.3	6,25YR 5/8	yellowish red/strong brown	NA	NA	NA	NA
720	Forest	F	Apui_01	07°10'47.1"	059°43'45.1"	South	Ph_02	TOP	3	2.37	0.23	0.046	4.01	3.62	148	3,75YR 4/6	dark red/yellowish red	NA	NA	NA	NA
810	Pasture	PF	Apui_02	07°13'01.2"	059°49'58.3"	South	Ph_02	TOP	1.81	1.4	0.139	0.03	4.91	3.99	26.9	6,25YR 5/8	yellowish red/strong brown	NA	NA	NA	NA
820	Forest	F	Apui_02	07°13'01.2"	059°49'58.3"	South	Ph_02	TOP	1.72	1.44	0.14	0.022	3.78	3.46	118.4	10YR 5/6	yellowish brown	NA	NA	NA	NA
910	Acai	PF	Humaita	07°48'41.2"	063°11'06.4"	South	Ph_02	TOP	1.39	1.06	0.125	0.014	4.52	3.84	35.6	10YR 5/8	yellowish brown	NA	NA	NA	NA
920	Forest	F	Humaita	07°48'41.2"	063°11'06.4"	South	Ph_02	TOP	1.38	1.11	0.149	0.016	4.23	3.71	63.5	10YR 6/6	brownish yellow	NA	NA	NA	NA
1010	Manioc	PF	Labrea	07°14'17.0"	064°43'40.4"	South	Ph_02	TOP	NA	NA	NA	NA	4.58	3.76	34.1	10YR 4/6	dark yellowish brown	NA	NA	NA	NA
1020	Forest	F	Labrea	07°14'17.0"	064°43'40.4"	South	Ph_02	TOP	1.82	1.47	0.152	0.021	4.13	3.67	58.9	10YR 5/6	yellowish brown	NA	NA	NA	NA
1110	Eucalypt	PF	Porto Velho	08°41'03.0"	064°01'09.3"	South	Ph_02	TOP	1.43	1.18	0.106	0.012	5.17	4.23	20.3	10YR 5/5	yellowish brown	NA	NA	NA	NA
1120	Forest	F	Porto Velho	08°41'03.0"	064°01'09.3"	South	Ph_02	TOP	2.18	1.79	0.162	0.018	3.98	3.58	65.6	10YR 5/7	yellowish brown	NA	NA	NA	NA
1210	Corn	PF	Nova California	09°45'06.8"	066°41'11.5"	South	Ph_02	TOP	1.5	1.15	0.143	0.019	4.55	4.32	31.5	8,75YR 5/6	strong brown/yellowish brown	NA	NA	NA	NA
1220	Forest	F	Nova California	09°45'06.8"	066°41'11.5"	South	Ph_02	TOP	2.07	1.7	0.2	0.027	4.87	4.52	81.9	6,25YR 4/6	yellowish red/strong brown	NA	NA	NA	NA
1310	Pasture	PF	Boca do Acre	09°00'45.6"	067°12'29.0"	South	Ph_02	TOP	2.18	1.71	0.194	0.025	4.78	4.21	24.1	10YR 4,5/6	dark yellowish brown/yellowish brown	NA	NA	NA	NA
1320	Forest	F	Boca do Acre	09°00'45.6"	067°12'29.0"	South	Ph_02	TOP	1.05	0.76	0.095	0.016	3.99	3.63	69.2	10YR 5/8	yellowish brown	NA	NA	NA	NA
110	Brazil nut	PF	Itacoatiara	03°00'57.2"	058°49'59.4	Central	Ph_03	TOP	2.4	2.05	0.173	0.04	4.88	3.83	32	10YR 6/4	light yellowish brown	NA	NA	NA	NA
120	Forest	F	Itacoatiara	03°00'57.2"	058°49'59.4	Central	Ph_03	TOP	2.56	2.58	0.189	0.041	4.54	3.82	53.5	10YR 6/4	light yellowish brown	NA	NA	NA	NA
210	Forest	F	Rio Preto da Eva	02°31'59.4"	060°01'24.7"	Central	Ph_03	TOP	2.31	1.96	0.188	0.038	4.97	3.94	46.4	10YR 7/3,5	very pale brown	NA	NA	NA	NA
220	Forest	F	Rio Preto da Eva	02°31'59.4"	060°01'24.7"	Central	Ph_03	TOP	2.11	1.81	0.182	0.034	4.81	3.92	28.1	10YR 7/3,5	very pale brown	NA	NA	NA	NA
310	Rubber tree	PF	Manaus Embrapa	02°53'24.4"	059°58'11.9"	Central	Ph_03	TOP	2.2	1.83	0.196	0.041	4.69	3.87	41.8	10YR 6/3	pale brown	NA	NA	NA	NA
320	Forest	F	Manaus Embrapa	02°53'24.4"	059°58'11.9"	Central	Ph_03	TOP	2.31	2.07	0.184	0.042	4.14	3.72	61.2	10YR 7/3,5	very pale brown	NA	NA	NA	NA
410	Forest	F	Manaus Ducke	02°54'47.0"	059°58'47.5"	Central	Ph_03	TOP	2.35	2.07	0.148	0.025	4.22	3.73	47.5	10YR 7/3,5	very pale brown	NA	NA	NA	NA
420	Forest	F	Manaus Ducke	02°54'47.0"	059°58'47.5"	Central	Ph_03	TOP	2.74	2.48	0.195	0.033	4.79	3.79	29.9	10YR 6/3	pale brown	NA	NA	NA	NA
430	Tree plant.	PF	Manaus Ducke	02°54'47.0"	059°58'47.5"	Central	Ph_03	TOP	2.56	2.18	0.202	0.03	4.36	3.75	70.6	10YR 7/4	very pale brown	NA	NA	NA	NA
510	Orange	PF	Iranduba	03°15'17.4"	060°13'35.4"	Central	Ph_03	TOP	1.3	1.18	0.099	0.016	4.91	4.04	26.9	10YR 4/3,5	brown	NA	NA	NA	NA
520	Forest TPI	F	Iranduba	03°15'17.4"	060°13'35.4"	Central	Ph_03	TOP	2.46	2.18	0.188	0.028	5.95	5.03	31.8	10YR 4/3	dark greyish brown	NA	NA	NA	NA
530	Forest	F	Iranduba	03°15'17.4"	060°13'35.4"	Central	Ph_03	TOP	1.56	1.36	0.116	0.019	4.41	3.84	48.8	10YR 4/4	dark yellowish brown	NA	NA	NA	NA
610	Orange	PF	Manacapuru	03°16'44.0"	060°30'08.2"	Central	Ph_03	TOP	1.69	1.54	0.143	0.019	5.18	4.1	21.1	10YR 5/6	yellowish brown	NA	NA	NA	NA
620	Brazil nut	PF	Manacapuru	03°16'44.0"	060°30'08.2"	Central	Ph_03	TOP	1.91	1.71	0.158	0.02	4.92	3.71	14.5	10YR 5/7	yellowish brown	NA	NA	NA	NA
630	Forest	F	Manacapuru	03°16'44.0"	060°30'08.2"	Central	Ph_03	TOP	3.25	2.6	0.233	0.023	5.01	4.02	33.7	10YR 5/4	yellowish brown	NA	NA	NA	NA
710	Pasture	PF	Apui_01	07°10'47.1"	059°43'45.1"	South	Ph_03	TOP	1.87	1.56	0.146	0.027	6.21	5.37	79.7	7,5YR 5/7	strong brown	NA	NA	NA	NA
720	Forest	F	Apui_01	07°10'47.1"	059°43'45.1"	South	Ph_03	TOP	2.16	1.51	0.172	0.044	4.02	3.68	78.2	5YR 5/6	yellowish red	NA	NA	NA	NA
810	Pasture	PF	Apui_02	07°13'01.2"	059°49'58.3"	South	Ph_03	TOP	2.28	1.95	0.186	0.033	5.76	4.49	11.5	10YR 5/7	yellowish brown	NA	NA	NA	NA
820	Forest	F	Apui_02	07°13'01.2"	059°49'58.3"	South	Ph_03	TOP	1.39	1.08	0.12	0.022	4.64	3.71	79.8	10YR 5/8	yellowish brown	NA	NA	NA	NA
910	Acai	PF	Humaita	07°48'41.2"	063°11'06.4"	South	Ph_03	TOP	1.15	1.01	0.107	0.012	5.02	3.86	13.8	10YR 6/6	brownish yellow	NA	NA	NA	NA
920	Forest	F	Humaita	07°48'41.2"	063°11'06.4"	South	Ph_03	TOP	1.13	0.92	0.137	0.012	4.88	3.73	19.3	10YR 6/6	brownish yellow	NA	NA	NA	NA
1010	Manioc	PF	Labrea	07°14'17.0"	064°43'40.4"	South	Ph_03	TOP	1.25	1.06	0.116	0.018	NA	NA	NA	NA	NA	NA	NA	NA	NA
1020	Forest	F	Labrea	07°14'17.0"	064°43'40.4"	South	Ph_03	TOP	1.35	1.18	0.128	0.024	NA	NA	NA	NA	NA	NA	NA	NA	NA
1110	Eucalypt	PF	Porto Velho	08°41'03.0"	064°01'09.3"	South	Ph_03	TOP	1.5	1.36	0.115	0.012	5.16	4.41	24.4	10YR 5/5	yellowish brown	NA	NA	NA	NA
1120	Forest	F	Porto Velho	08°41'03.0"	064°01'09.3"	South	Ph_03	TOP	1.83	1.58	0.146	0.018	4.44	3.72	29.1	10YR 6/6	brownish yellow	NA	NA	NA	NA
1210	Corn	PF	Nova California	09°45'06.8"	066°41'11.5"	South	Ph_03	TOP	1.34	1.09	0.135	0.02	5.23	4.29	22.8	7,5YR 5/8	strong brown	NA	NA	NA	NA
1220	Forest	F	Nova California	09°45'06.8"	066°41'11.5"	South	Ph_03	TOP	1.3	1.08	0.127	0.026	4.98	3.92	27.9	7,5YR 5/8	strong brown	NA	NA	NA	NA
1310	Pasture	PF	Boca do Acre	09°00'45.6"	067°12'29.0"	South	Ph_03	TOP	1.6	1.28	0.166	0.03	5.29	3.94	15.8	10YR 5/8	yellowish brown	NA	NA	NA	NA
1320	Forest	F	Boca do Acre	09°00'45.6"	067°12'29.0"	South	Ph_03	TOP	1.11	0.93	0.105	0.015	4.78	3.92	32.1	10YR 5/8	yellowish brown	NA	NA	NA	NA
110	Brazil nut	PF	Itacoatiara	03°00'57.2"	058°49'59.4	Central	Ph_01	BOT	1.26	0.84	0.093	0.031	4.32	3.81	29.5	10YR 7/4	very pale brown	7.99	19.36	72.65	very clayey
120	Forest	F	Itacoatiara	03°00'57.2"	058°49'59.4	Central	Ph_01	BOT	1.26	0.89	0.097	0.03	4.3	3.87	40.1	10YR 7/4	very pale brown	7.59	19.26	73.15	very clayey
210	Forest	F	Rio Preto da Eva	02°31'59.4"	060°01'24.7"	Central	Ph_01	BOT	1.14	0.77	0.092	0.032	4.38	3.97	34.2	2,5YR 8/3	pale yellow	11.44	21.01	67.55	clayey
220	Forest	F	Rio Preto da Eva	02°31'59.4"	060°01'24.7"	Central	Ph_01	BOT	1.13	0.78	0.095	0.034	4.43	3.96	27.9	2,5YR 8/3	pale yellow	8.65	21.75	69.6	clayey
310	Rubber tree	PF	Manaus Embrapa	02°53'24.4"	059°58'11.9"	Central	Ph_01	BOT	1	0.89	0.093	0.049	NA	NA	NA	NA	NA	NA	NA	NA	NA
320	Forest	F	Manaus Embrapa	02°53'24.4"	059°58'11.9"	Central	Ph_01	BOT	1.22	1.05	0.114	0.042	NA	NA	NA	NA	NA	NA	NA	NA	NA
410	Jacareuba	PF	Manaus Ducke	02°54'47.0"	059°58'47.5"	Central	Ph_01	BOT	NA	NA	NA	NA	NA	NA	NA	NA	NA	NA	NA	NA	NA
420	Forest	F	Manaus Ducke	02°54'47.0"	059°58'47.5"	Central	Ph_01	BOT	0.96	0.83	0.079	0.039	NA	NA	NA	NA	NA	NA	NA	NA	NA
430	Forest	F	Manaus Ducke	02°54'47.0"	059°58'47.5"	Central	Ph_01	BOT	NA	NA	NA	NA	NA	NA	NA	NA	NA	NA	NA	NA	NA
510	Orange	PF	Iranduba	03°15'17.4"	060°13'35.4"	Central	Ph_01	BOT	0.82	0.67	0.055	0.014	4.79	3.98	21.3	6,25YR 5/3	brown/light olive brown	49.8	5.7	44.5	sandy clay
520	Forest TPI	F	Iranduba	03°15'17.4"	060°13'35.4"	Central	Ph_01	BOT	0.73	0.66	0.057	0.017	5.37	4.42	20.6	10YR 5/6	yellowish brown	28.41	5.49	66.1	very clayey
530	Forest	F	Iranduba	03°15'17.4"	060°13'35.4"	Central	Ph_01	BOT	0.84	0.68	0.051	0.017	4.4	3.88	30.3	10YR 5/5	yellowish brown	50.69	7.31	42	sandy loam
610	Orange	PF	Manacapuru	03°16'44.0"	060°30'08.2"	Central	Ph_01	BOT	0.74	0.51	0.064	0.019	4.65	3.86	27.6	7,5YR 6/8	reddish brown	22.12	39.03	38.85	clayey loam to silty clay
620	Brazil nut	PF	Manacapuru	03°16'44.0"	060°30'08.2"	Central	Ph_01	BOT	0.83	0.58	0.079	0.018	4.56	3.81	17.2	7,5YR 5/8	strong brown	19.27	38.73	42	clay to silty clay
630	Forest	F	Manacapuru	03°16'44.0"	060°30'08.2"	Central	Ph_01	BOT	0.88	0.64	0.07	0.012	4.4	3.82	23.8	8,75YR 5,5/8	brownish yellow/strong brown	23.79	60.81	15.4	silty loam
710	Pasture	PF	Apui_01	07°10'47.1"	059°43'45.1"	South	Ph_01	BOT	0.9	0.63	0.066	0.029	4.52	4	32	5YR 5/6	yellowish red	20.83	13.62	65.55	clayey
720	Forest	F	Apui_01	07°10'47.1"	059°43'45.1"	South	Ph_01	BOT	1.25	0.96	0.092	0.045	4.48	4.01	33.7	5YR 5/7	yellowish red	9.37	12.93	77.7	very clayey
810	Pasture	PF	Apui_02	07°13'01.2"	059°49'58.3"	South	Ph_01	BOT	1.54	1.21	0.088	0.04	4.62	3.98	23.2	10YR 5/7	yellowish brown	15.03	14.77	70.2	very clayey
820	Forest	F	Apui_02	07°13'01.2"	059°49'58.3"	South	Ph_01	BOT	0.92	0.63	0.067	0.02	4.33	3.84	30.1	10YR 5,5/6	brownish yellow/yellowish brown	38.05	13.35	48.6	clayey
910	Acai	PF	Humaita	07°48'41.2"	063°11'06.4"	South	Ph_01	BOT	0.62	0.46	0.071	0.009	4.63	3.72	15.5	7,5YR 5,5/8	reddish yellow/strong brown	11.65	55.5	32.85	silty clay loam
920	Forest	F	Humaita	07°48'41.2"	063°11'06.4"	South	Ph_01	BOT	0.65	0.5	0.075	0.01	4.51	3.77	15.6	10YR 6/7	brownish yellow	7.63	58.22	34.15	silty clay loam
1010	Manioc	PF	Labrea	07°14'17.0"	064°43'40.4"	South	Ph_01	BOT	0.73	0.56	0.07	0.011	4.51	3.76	17.4	10YR 6/8	brownish yellow	20.45	50.7	28.85	clayey loam
1020	Forest	F	Labrea	07°14'17.0"	064°43'40.4"	South	Ph_01	BOT	0.83	0.6	0.076	0.011	4.22	3.82	16	10YR 6/6	brownish yellow	17.75	58	24.25	silty loam
1110	Eucalypt	PF	Porto Velho	08°41'03.0"	064°01'09.3"	South	Ph_01	BOT	0.55	0.41	0.045	0.009	4.96	3.86	12.7	10YR 6,5/8	brownish yellow/yellow	20.69	51.36	27.95	clayey loam
1120	Forest	F	Porto Velho	08°41'03.0"	064°01'09.3"	South	Ph_01	BOT	0.69	0.49	0.062	0.009	4.29	3.79	22.8	10YR 6,5/8	brownish yellow/yellow	17.58	57.82	24.6	silty loam
1210	Corn	PF	Nova California	09°45'06.8"	066°41'11.5"	South	Ph_01	BOT	0.82	0.59	0.085	0.025	4.46	3.9	42.8	7,5YR 5/8	strong brown	23	24.3	52.7	clayey
1220	Forest	F	Nova California	09°45'06.8"	066°41'11.5"	South	Ph_01	BOT	1.01	0.75	0.086	0.018	4.38	3.83	29.4	7,5YR 5/6	strong brown	21.86	20.04	58.1	clayey
1310	Pasture	PF	Boca do Acre	09°00'45.6"	067°12'29.0"	South	Ph_01	BOT	1	0.77	0.099	0.023	4.89	3.84	13.5	10YR 6/8	brownish yellow	18.84	35.71	45.45	clayey
1320	Forest	F	Boca do Acre	09°00'45.6"	067°12'29.0"	South	Ph_01	BOT	0.45	0.34	0.045	0.012	4.06	3.82	20.6	10YR 6/8	brownish yellow	57.44	25.21	17.35	sandy loam
110	Brazil nut	PF	Itacoatiara	03°00'57.2"	058°49'59.4	Central	Ph_02	BOT	1.02	0.94	0.085	0.036	4.34	3.89	31.6	10YR 7/4	very pale brown	NA	NA	NA	NA
120	Forest	F	Itacoatiara	03°00'57.2"	058°49'59.4	Central	Ph_02	BOT	1.16	1.05	0.099	0.036	4.1	3.88	46.7	10YR 7/4	very pale brown	NA	NA	NA	NA
210	Forest	F	Rio Preto da Eva	02°31'59.4"	060°01'24.7"	Central	Ph_02	BOT	1.11	0.85	0.097	0.033	4.45	4.07	29.7	10YR 8/4	very pale brown	NA	NA	NA	NA
220	Forest	F	Rio Preto da Eva	02°31'59.4"	060°01'24.7"	Central	Ph_02	BOT	1.16	0.91	0.099	0.036	4.49	4.04	24.9	10YR 7,5/4	very pale brown	NA	NA	NA	NA
310	Rubber tree	PF	Manaus Embrapa	02°53'24.4"	059°58'11.9"	Central	Ph_02	BOT	0.97	0.87	0.092	0.042	4.33	3.98	35.4	10YR 7,5/4	very pale brown	NA	NA	NA	NA
320	Forest	F	Manaus Embrapa	02°53'24.4"	059°58'11.9"	Central	Ph_02	BOT	1.11	1	0.102	0.045	4.3	3.99	37.7	10YR 7/6	yellow	NA	NA	NA	NA
410	Forest	F	Manaus Ducke	02°54'47.0"	059°58'47.5"	Central	Ph_02	BOT	1.11	1.01	0.091	0.039	4.44	4	39.2	10YR 7/4	very pale brown	NA	NA	NA	NA
420	Forest	F	Manaus Ducke	02°54'47.0"	059°58'47.5"	Central	Ph_02	BOT	1.12	0.91	0.097	0.039	4.43	4.01	31.6	10YR 7,5/4	very pale brown	NA	NA	NA	NA
430	Tree plant.	PF	Manaus Ducke	02°54'47.0"	059°58'47.5"	Central	Ph_02	BOT	1.03	0.97	0.09	0.04	4.53	4	29.2	10YR 7,5/4	very pale brown	NA	NA	NA	NA
510	Orange	PF	Iranduba	03°15'17.4"	060°13'35.4"	Central	Ph_02	BOT	0.82	0.78	0.061	0.016	5.17	4.18	26	10YR 5/3,45	brown/yellowish brown	NA	NA	NA	NA
520	Forest TPI	F	Iranduba	03°15'17.4"	060°13'35.4"	Central	Ph_02	BOT	1.24	1.15	0.076	0.021	5.21	4.21	21.7	10YR 4/3	brown	NA	NA	NA	NA
530	Forest	F	Iranduba	03°15'17.4"	060°13'35.4"	Central	Ph_02	BOT	1.3	1.02	0.103	0.023	4.21	3.83	51.8	10YR 54/6	dark yellowish brown	NA	NA	NA	NA
610	Orange	PF	Manacapuru	03°16'44.0"	060°30'08.2"	Central	Ph_02	BOT	1.01	0.89	0.093	0.023	4.61	3.84	29.6	7,5YR 5/8	strong brown	NA	NA	NA	NA
620	Brazil nut	PF	Manacapuru	03°16'44.0"	060°30'08.2"	Central	Ph_02	BOT	0.97	0.87	0.09	0.018	4.31	3.73	20.7	7,5YR 6/8	reddish brown	NA	NA	NA	NA
630	Forest	F	Manacapuru	03°16'44.0"	060°30'08.2"	Central	Ph_02	BOT	1.25	1.11	0.097	0.016	4.44	3.78	29.7	8,75YR 5/8	strong brown/yellowish brown	NA	NA	NA	NA
710	Pasture	PF	Apui_01	07°10'47.1"	059°43'45.1"	South	Ph_02	BOT	1.08	0.86	0.083	0.038	4.64	4.04	34.1	5YR 5/6	yellowish red	NA	NA	NA	NA
720	Forest	F	Apui_01	07°10'47.1"	059°43'45.1"	South	Ph_02	BOT	1.3	1.01	0.106	0.054	4.23	4.06	52.7	5YR 5/6	yellowish red	NA	NA	NA	NA
810	Pasture	PF	Apui_02	07°13'01.2"	059°49'58.3"	South	Ph_02	BOT	1.42	1.17	0.111	0.038	4.68	4.01	24.7	8,75YR 5/8	strong brown/yellowish brown	NA	NA	NA	NA
820	Forest	F	Apui_02	07°13'01.2"	059°49'58.3"	South	Ph_02	BOT	0.79	0.66	0.064	0.022	4.27	3.88	34.1	10YR 5/8	yellowish brown	NA	NA	NA	NA
910	Acai	PF	Humaita	07°48'41.2"	063°11'06.4"	South	Ph_02	BOT	0.72	0.55	0.085	0.015	4.57	3.73	23.2	7,5YR 5/8	strong brown	NA	NA	NA	NA
920	Forest	F	Humaita	07°48'41.2"	063°11'06.4"	South	Ph_02	BOT	0.7	0.58	0.085	0.011	4.64	3.73	22.6	7,5YR 5/6	strong brown	NA	NA	NA	NA
1010	Manioc	PF	Labrea	07°14'17.0"	064°43'40.4"	South	Ph_02	BOT	0.99	0.79	0.095	0.013	4.36	3.69	35.8	10YR 5,5/8	yellowish brown/brownish yellow	NA	NA	NA	NA
1020	Forest	F	Labrea	07°14'17.0"	064°43'40.4"	South	Ph_02	BOT	0.99	0.86	0.089	0.011	4.3	3.82	28.9	10YR 5/8	brownish yellow	NA	NA	NA	NA
1110	Eucalypt	PF	Porto Velho	08°41'03.0"	064°01'09.3"	South	Ph_02	BOT	0.55	0.46	0.054	0.011	4.97	3.9	9.9	8,75YR 5/8	strong brown/yellowish brown	NA	NA	NA	NA
1120	Forest	F	Porto Velho	08°41'03.0"	064°01'09.3"	South	Ph_02	BOT	0.89	0.76	0.074	0.011	4.28	3.81	32.7	10YR 5/8	brownish yellow	NA	NA	NA	NA
1210	Corn	PF	Nova California	09°45'06.8"	066°41'11.5"	South	Ph_02	BOT	0.91	0.74	0.097	0.02	4.83	4.21	25.6	10YR 5/8	yellowish brown	NA	NA	NA	NA
1220	Forest	F	Nova California	09°45'06.8"	066°41'11.5"	South	Ph_02	BOT	1.05	0.84	0.095	0.021	4.89	4.22	36.2	5YR 4/6	yellowish red	NA	NA	NA	NA
1310	Pasture	PF	Boca do Acre	09°00'45.6"	067°12'29.0"	South	Ph_02	BOT	1.13	0.88	0.114	0.022	4.68	3.86	15.6	8,75YR 5/7	strong brown/yellowish brown	NA	NA	NA	NA
1320	Forest	F	Boca do Acre	09°00'45.6"	067°12'29.0"	South	Ph_02	BOT	0.49	0.42	0.045	0.013	4.24	3.77	33.1	10YR 5,5/8	brownish yellow/yellowish brown	NA	NA	NA	NA
110	Brazil nut	PF	Itacoatiara	03°00'57.2"	058°49'59.4	Central	Ph_03	BOT	0.93	0.82	0.048	0.015	4.48	3.91	22.2	10YR 7/4	very pale brown	NA	NA	NA	NA
120	Forest	F	Itacoatiara	03°00'57.2"	058°49'59.4	Central	Ph_03	BOT	1.22	0.98	0.097	0.036	4.42	3.97	32.7	10YR 7,5/4	very pale brown	NA	NA	NA	NA
210	Forest	F	Rio Preto da Eva	02°31'59.4"	060°01'24.7"	Central	Ph_03	BOT	1.05	0.93	0.092	0.038	4.58	4.06	26.6	10YR 8/4	very pale brown	NA	NA	NA	NA
220	Forest	F	Rio Preto da Eva	02°31'59.4"	060°01'24.7"	Central	Ph_03	BOT	1.05	0.96	0.094	0.042	4.56	4.03	23.3	10YR 8/4	very pale brown	NA	NA	NA	NA
310	Rubber tree	PF	Manaus Embrapa	02°53'24.4"	059°58'11.9"	Central	Ph_03	BOT	1.07	0.91	0.101	0.042	4.39	3.97	37.6	10YR 7,5/4	very pale brown	NA	NA	NA	NA
320	Forest	F	Manaus Embrapa	02°53'24.4"	059°58'11.9"	Central	Ph_03	BOT	1.3	1.18	0.115	0.039	4.26	3.91	46.3	10YR 7/4	very pale brown	NA	NA	NA	NA
410	Forest	F	Manaus Ducke	02°54'47.0"	059°58'47.5"	Central	Ph_03	BOT	1.02	1.01	0.077	0.028	4.62	4.04	21.2	10YR 7/4	very pale brown	NA	NA	NA	NA
420	Forest	F	Manaus Ducke	02°54'47.0"	059°58'47.5"	Central	Ph_03	BOT	1.23	1.07	0.102	0.032	4.33	3.96	41	10YR 7/4	very pale brown	NA	NA	NA	NA
430	Tree plant.	PF	Manaus Ducke	02°54'47.0"	059°58'47.5"	Central	Ph_03	BOT	1.26	1.08	0.1	0.032	4.53	4.02	32.5	10YR 7,5/4	very pale brown	NA	NA	NA	NA
510	Orange	PF	Iranduba	03°15'17.4"	060°13'35.4"	Central	Ph_03	BOT	1.04	0.73	0.075	0.017	5.08	4.03	17.1	10YR 5/3,5	brown/yellowish brown	NA	NA	NA	NA
520	Forest TPI	F	Iranduba	03°15'17.4"	060°13'35.4"	Central	Ph_03	BOT	1.36	1.06	0.092	0.021	5.29	4.31	20.9	10YR 5/3,5	brown/yellowish brown	NA	NA	NA	NA
530	Forest	F	Iranduba	03°15'17.4"	060°13'35.4"	Central	Ph_03	BOT	0.96	0.86	0.068	0.02	4.52	4.03	27.4	10YR 5/6	yellowish brown	NA	NA	NA	NA
610	Orange	PF	Manacapuru	03°16'44.0"	060°30'08.2"	Central	Ph_03	BOT	0.69	0.6	0.073	0.02	5	4.12	22.9	7,5YR 5,5/8	reddish yellow/strong brown	NA	NA	NA	NA
620	Brazil nut	PF	Manacapuru	03°16'44.0"	060°30'08.2"	Central	Ph_03	BOT	0.89	0.8	0.091	0.015	4.59	3.89	15.5	7,5YR 5,5/8	reddish yellow/strong brown	NA	NA	NA	NA
630	Forest	F	Manacapuru	03°16'44.0"	060°30'08.2"	Central	Ph_03	BOT	0.83	0.73	0.075	0.017	4.41	3.94	15.1	7,5YR 5,5/8	reddish yellow/strong brown	NA	NA	NA	NA
710	Pasture	PF	Apui_01	07°10'47.1"	059°43'45.1"	South	Ph_03	BOT	1.05	0.9	0.087	0.038	5.28	4.66	37.1	5YR 5/7	yellowish red	NA	NA	NA	NA
720	Forest	F	Apui_01	07°10'47.1"	059°43'45.1"	South	Ph_03	BOT	1.13	0.9	0.093	0.049	4.56	4.12	27.2	3,75YR 5/8	red/yellowish red	NA	NA	NA	NA
810	Pasture	PF	Apui_02	07°13'01.2"	059°49'58.3"	South	Ph_03	BOT	1.37	1.14	0.108	0.027	5.12	4.28	19.6	8,75YR 5/7	strong brown/yellowish brown	NA	NA	NA	NA
820	Forest	F	Apui_02	07°13'01.2"	059°49'58.3"	South	Ph_03	BOT	0.98	0.89	0.076	0.02	4.47	3.98	27.7	10YR 5/8	strong brown	NA	NA	NA	NA
910	Acai	PF	Humaita	07°48'41.2"	063°11'06.4"	South	Ph_03	BOT	0.63	0.55	0.084	0.01	4.83	3.9	12	6,25YR 5/7	yellowish red/strong brown	NA	NA	NA	NA
920	Forest	F	Humaita	07°48'41.2"	063°11'06.4"	South	Ph_03	BOT	0.57	0.5	0.073	0.01	4.63	3.81	10.5	7,5YR 6/8	reddish yellow	NA	NA	NA	NA
1010	Manioc	PF	Labrea	07°14'17.0"	064°43'40.4"	South	Ph_03	BOT	0.71	0.6	0.083	0.017	NA	NA	NA	NA	NA	NA	NA	NA	NA
1020	Forest	F	Labrea	07°14'17.0"	064°43'40.4"	South	Ph_03	BOT	0.64	0.56	0.071	0.02	NA	NA	NA	NA	NA	NA	NA	NA	NA
1110	Eucalypt	PF	Porto Velho	08°41'03.0"	064°01'09.3"	South	Ph_03	BOT	0.53	0.45	0.054	0.008	4.43	3.93	11.7	10YR 6/8	brownish yellow	NA	NA	NA	NA
1120	Forest	F	Porto Velho	08°41'03.0"	064°01'09.3"	South	Ph_03	BOT	0.67	0.55	0.065	0.01	4.96	3.9	9.2	10YR 6/6	brownish yellow	NA	NA	NA	NA
1210	Corn	PF	Nova California	09°45'06.8"	066°41'11.5"	South	Ph_03	BOT	0.83	0.69	0.088	0.017	4.89	4.07	16.6	7,5YR 5/7	strong brown	NA	NA	NA	NA
1220	Forest	F	Nova California	09°45'06.8"	066°41'11.5"	South	Ph_03	BOT	0.91	0.79	0.078	0.019	4.63	3.91	31.2	7,5YR 5/6	strong brown	NA	NA	NA	NA
1310	Pasture	PF	Boca do Acre	09°00'45.6"	067°12'29.0"	South	Ph_03	BOT	1.02	0.86	0.109	0.023	4.93	3.88	11.9	7,5YR 5/7	strong brown	NA	NA	NA	NA
1320	Forest	F	Boca do Acre	09°00'45.6"	067°12'29.0"	South	Ph_03	BOT	0.48	0.42	0.046	0.015	4.68	3.94	18.7	10YR 6/8	brownish yellow	NA	NA	NA	NA
