# Supplementary material for: Carbon, nitrogen and sulfur (CNS) status and dynamics in Amazon basin upland soils, Brazil
Source: Copernicus journal article supplement (doi:10.5194/soil-2019-16), 2019-04-15
Supplement: Supplementary file 1 [file SOIL_2019-Matschullat-et-al_CNS-ERA_24-03-2019.pdf › SOIL_2019-Matschullat-et-al_CNS-ERA_24-03-2019.pdf]

# Carbon, nitrogen and sulfur (CNS) status and dynamics in Amazon basin upland soils, Brazil

Jörg Matschullat<sup>1</sup>, Roberval Monteiro Bezerra de Lima<sup>2</sup>, Sophie F. von Fromm<sup>1,3</sup>, Solveig Pospiech<sup>4</sup>, Andrea M. Ramos<sup>5</sup>, Gilvan Coimbra Martins<sup>2</sup>, Katharina Lenhart<sup>6</sup>

<sup>1</sup>Interdisciplinary Environmental Research Centre, TU Bergakademie Freiberg, Brennhausgasse 14, 09599 Freiberg, Germany; email: [matschul@tu-freiberg.de](mailto:matschul@tu-freiberg.de); ORCID: 0000-0003-0549-7354

<sup>2</sup>Embrapa Amazônia Ocidental, Rodovia AM 10, km 29, s/n, Manaus, AM, CEP 69010-970, Brazil; email: [roberval.lima@embrapa.br](mailto:roberval.lima@embrapa.br); ORCID 0000-0003-1260-447X

<sup>3</sup>Max-Planck-Institute for Biogeochemistry, P.O. Box 100164, 07701 Jena, Germany; email: [sfromm@bgc-jena.mpg.de](mailto:sfromm@bgc-jena.mpg.de); ORCID 0000-0002-1820-1455

<sup>4</sup>Helmholtz Institute for Resource Technology, Chemnitz Str. 40, 09599 Freiberg, Germany; email: [s.pospiech@hzdr.de](mailto:s.pospiech@hzdr.de); ORCID 0000-0003-2727-2375

<sup>5</sup>National Institute for Meteorology INMET, St. Sudoeste-Brasília, DF, CEP 70680-900, Brazil; email: [andrea.amos@inmet.gov.br](mailto:andrea.amos@inmet.gov.br); ORCID 0000-0001-7414-3395

<sup>6</sup>Technische Hochschule Bingen, Berlinstraße 109, 55411 Bingen am Rhein, Germany; email: [k.lenhart@th-bingen.de](mailto:k.lenhart@th-bingen.de); ORCID 0000-0001-5226-492X

Correspondence to: Jörg Matschullat ([matschul@tu-freiberg.de](mailto:matschul@tu-freiberg.de))

## Key Points:

- Quantification of Amazon basin upland soil CNS concentrations and  $C_{org}/N$  ratios
- CNS median concentrations are similar to European soils; ranges are more narrow
- In up to 50 years after deforestation, average  $C_t$ ,  $C_{org}$  and N losses of up to 20 % in post-forest soils
- Intra-annual dynamics of soil pH-values and electrical conductivities under generally acidic to strongly acidic conditions and very low  $\lambda$
- Central Amazonas soils show stronger differences between forest and post-forest land than southern Amazonas soils – indicator of significant impact and edge effects in the south?

**Key words:** tropical soils; terra firme; oxisol; ferralsol; soil biogeochemistry; climate change; nutrient ratios, hydrological gradient

**Abstract.** Given the dimensions of the Amazon basin (7.5 million km<sup>2</sup>), its internal dynamics, increasing anthropogenic strain on this large biome, and its global role as one of two continental biospheric tipping elements, it appears crucial to have data-based knowledge on carbon and nitrogen concentrations and pools as well as on possible intra-annual dynamics. We quantified carbon ( $C_t$ ,  $C_{org}$ ), nitrogen (N) and sulfur (S) concentrations in litter (ORG) and mineral soil material (TOP 0–20 cm, BOT 30–50 cm) of upland (terra firme) oxisols across Amazonas state and present a first pool calculation. Data are based on triplicate seasonal sampling at 29 sites (forest and post-forest) within the binational project EcoRespira-Amazon (ERA). Repeated sampling increased data accuracy and allows for interpreting intra-annual (seasonal) and climate-change related dynamics. Extreme conditions between the dry season in 2016 and the subsequent wet season (ENSO-related) show differences more clearly. Median CNS in the Amazon basin TOP soils ( $C_t$  1.9,  $C_{org}$  1.6, N 0.15, S 0.03 wt-% under forest canopy) as well as  $C_{org}/N$  ratios show concentrations similar to European soils (FOREGS, GEMAS). TOP  $C_t$  concentrations ranged from 1.02 to 3.29 wt-% (median<sub>Forest</sub> 2.17 wt-%; median<sub>Post-Forest</sub> 1.75 wt-%), N from 0.088 to 0.233 wt-% (median<sub>Forest</sub> 0.17 wt-%; median<sub>Post-Forest</sub> 0.09 wt-%) and S from 0.012 to 0.051 wt-% (median<sub>Forest</sub> 0.03 wt-%; median<sub>Post-Forest</sub> 0.02 wt-%).

42 %).  $C_{org}/N$  ratios ranged from 6 to 14 (median 10). A first pool calculation (hectare-based) illustrates forest versus  
43 post-forest changes. The elements are unevenly distributed in the basin with generally higher CNS values in the  
44 central part (Amazonas graben) as compared to the southern part of the basin. Deforestation and drought condi-  
45 tions lead to C and N losses – within 50 years after deforestation, C and N losses average 10 to 15 %. Regional  
46 climate change with increased drought will likely speed up carbon and nitrogen losses.

## 47 1 Introduction

48 The Amazon basin is seen as one of the terrestrial tipping elements (Lenton et al., 2008) with global impacts to  
49 be expected when triggered (Reid et al., 2015). Several works suggest that the Amazon rainforest biome may tip  
50 by the end of this century, and give rise to a subsequent, more dry forest environment (Shukla et al., 2008). Re-  
51 cent changes in the basin (Davidson et al., 2012; Fearnside, 2018; Hubbell et al., 2008; Longobardi et al., 2016;  
52 McGrath et al., 2001; Rosa et al., 2016; Shukla et al., 2008), including increasing extreme events such as drought  
53 (e.g., dry season 2016) with strong impacts on the hydrological cycle far beyond the basin (Aragão, 2012; Da-  
54 vidson et al., 2012; Jiménez-Muñoz et al., 2016; Lewis et al., 2011; Marengo, 2006) corroborate that hypothesis.  
55 It is in this light that evidence-based knowledge and reliable data are needed to better assess possible resilience  
56 and consequences of current land use in the basin. Nagy et al. (2016) compiled related state-of-the-art of  
57 knowledge in biosphere-atmosphere-human land use interactions within the Amazon basin, updating and ex-  
58 panding previous work (e.g., McClain et al., 2001). Cerri et al. (2006a) pointed out the knowns and unknowns of  
59 land conversion in Latin America with particular emphasis on soil carbon sequestration, with Cerri et al. (2006b)  
60 breaking this attempt down to the Amazonian tropical rainforest biome. One conclusion is that reliable data are  
61 still scarce. Nitrogen data are particularly missing. Given the relevance of the carbon and nitrogen cycles in  
62 global change, and the diverse estimates of related soil pools (e.g. Baldock, 2007; McNeill and Unkovich, 2007)  
63 it appears particularly valuable to obtain better data. Various questions remain unanswered to better understand  
64 carbon, nitrogen and sulfur (CNS) cycling in humid tropical forest regions, and particularly about consequences  
65 of human impact in such systems. Key questions for this work can thus be formulated:

66 What are CNS concentrations in Amazon basin soils – and how do these compare to other world soils? Are there  
67 differences in CNS status between forest and post-forest land? Is the CNS status similar throughout the year or  
68 do we see intra-annual dynamics? How do mineral soil CNS concentrations relate to the organic litter layer? Is  
69 the hydrological difference between the more humid central part of the basin and its southern “shoulder” rele-  
70 vant? Which consequences may future increasing drought conditions have for CNS behaviour in Amazon basin  
71 soils?

72 Answers to these questions are used for a first upscaling attempt that also looks into the near future. Within the  
73 binational project EcoRespira-Amazon (ERA: <https://blogs.hrz.tu-freiberg.de/ecorespira/>), we studied the geo-  
74 chemistry of upland (terra firme) oxisols in Amazonas state, Brazil. It shows the CNS status and its intra-annual  
75 dynamics. The latter is based on our observations under extreme dry season and under wet season conditions  
76 during El Niño-Southern Oscillation (ENSO) and post-ENSO dominance (Jiménez-Muñoz et al., 2016).

77 Soil diversity in the tropics is high (Sanchez, 2019: 71f). Humid tropical soils such as those dominating the Am-  
78 azon basin are often reported to be nutrient-depleted (Richter and Babbar, 1991), even referred to as ‘infertile  
79 soils’ (Irion, 1978). This generalization may be partly true for base cations that are easily leached under the dom-  
80 inant high to very high soil acidity and plenty of water (Juo and Franzluebbers, 2003). Hydrolysis of primary

minerals there is about 100 times higher as compared to temperate climate soils (Glaser et al., 2004). The oxisols (ferralsols) in our study fall into this category (Juo and Franzluebbers, 2003). Other components including CNS may not follow such simplified vision. Sanchez (1977) already published average organic carbon values of 2.01 wt.-%. Bohn et al. (2001: 156f) interpret that as a result of strong interactions between soil organic matter (SOM) with Fe and Al hydroxy-oxides and allophane, which could stabilize SOM against microbial decay. At the same time, they acknowledge “*the high rate of year-round biomass production in the humid tropics*”, which counteracts the relative nutrient paucity in these soils. Previous works usually deliver spatially-clustered data; sometimes focussing on very large-scale soil variations (Quesada et al., 2010). A closer look at intra-basin physico-chemical variability appears necessary and helpful in order to better understand CNS dynamics and soil fertility in this potentially vulnerable system. Pre-Columbian tropical agricultural practices, such as “Indigenous Black Earth” (terra preta do índio) demonstrate that significant carbon and nitrogen enrichment is possible under these climatic conditions and that long-term steady state can be reached through appropriate land-use techniques (Glaser and Birk, 2012). These historical anthroposols may exemplify sustainable agriculture, to be frequently encountered near old settlements (Roosevelt, 2013; Sanchez, 2019: 285f; own observations).

Litter (ORG) and mineral soil (TOP and BOT) was collected to assess their element concentrations at the study sites. Repeated sampling of the same sites under different seasonal conditions served both quality control and to investigate seasonal dynamics, based on our observation of radically changing litter layer thickness between dry and wet season. Following a presentation of pH-values, electrical conductivity and soil colour, the CNS results in ORG, TOP and BOT material are discussed in detail. An attempt is made to upscale results to upland Amazon soil for the entire basin.

## **2 Materials and methods**

### **2.1 Site characteristics**

We sampled at 29 sites from 13 upland (terra firme) locations within Amazonas state, Brazil, covering an area of roughly 930 by 800 km (740,000 km<sup>2</sup>). Each location (Figure 1) represents 2–3 sites with different land cover; at least one forested (F), the other pastureland, plantation or agroforestry (post-forest sites, PF). The native forest locations showed some (mostly minor) human impact; their conjunct areas were considerably larger in the central part as compared to the south. To represent much of Amazon basin upland soils and their land cover, a corresponding number of sites was studied in the central part of the basin and across southern Amazonas state (Figure 1). Soils are generally fully oxidized on the macro scale (Sanchez, 1977). They were classified as oxisols (or ferralsols or latosols depending on classification type; Batjes, 2016; Ross, 2006; Sanchez, 2019). Hydrolysis under oxidizing acidic conditions is the dominant weathering agent (Juo and Franzluebbers, 2003).

Average location altitudes range from 25 m a.s.l. (06 Manacapuru) to 190 m a.s.l. (07 Apuí and 12 Nova Califórnia) with a median altitude of 90 m a.s.l. (mean: 105 m a.s.l.). The central part of the Amazon basin (Solimões-Amazon Graben) is characterized by lower average altitudes (median 75 m a.s.l., mean 80 m a.s.l.) and younger lithological material; mostly Cretaceous, Tertiary and Quaternary sediments (CPRM 2005). Deforestation is still moderate, albeit rather substantial near the selected locations. Six of the 13 locations are located here (Figure 1: 01–06), all part of the Eastern Amazon Basin plateau (Ross, 2006). The other seven locations (07–13) represent the southern “shoulder” of the basin, the ‘Marginal depression of southern Amazônia’ (Ross, 2006)

with a median elevation of 150 m a.s.l. (mean 130 m a.s.l.). Geologically, this is part of the older Amazonian Craton with partly surfacing Paleoproterozoic, Silurian and Devonian rocks and some Tertiary and Quaternary sediments (CPRM 2005). Deforestation here is partly radical (> 90 %).

Average annual temperature in the study area is 27 °C with maxima in September and October (28 °C) and minima from January to March (26.3 °C). The mean annual number of days with maximum monthly and annual temperatures exceeding 30 °C is 300 with the highest average in August and October (29 days) and the lowest in February (20 days). Sunshine hours average 1828.5 annually with monthly values exceeding 200 hours in July, August and September. Average atmospheric pressure in Manaus is 1003.7 millibar (PMSL 1010.7 mbar) with minima in November (1002.6 mbar; PMSL 1009.2 mbar), rising gradually until July (1005.4 mbar; PMSL 1012.5 mbar). Average annual precipitation amounts to 2301.2 mm with the driest month being August (64.3 mm). April is the wettest month with 319.0 mm. The mean annual number of days with precipitation above or equal to 1 mm is 155, with the highest average in January and March (19 days) and the lowest in September (6 days). The mean annual number of days with precipitation above or equal to 10 mm is 73 days, with the highest average in April (10 days) and the lowest in August (2 days). With 15 mm threshold, the mean annual number of days is 54 with the highest in April (8 days) and the lowest in August (1 day). Relatively high air humidity occurs all year round (avg. 82.8 %) with minima in September (72.2 %) and maxima in March (86.9 %). Annual mean prevailing wind direction is Southeast, followed by north-easterly air streams. Average annual potential evapotranspiration is 192 mm with maxima in October (234.4 mm) and minima in February (167.1 mm).

These average data (climate normal of 1981–2010) see some shift, when comparing them with data from the past (CLINO 1961–1990; electronic supplement Table A01). Conditions during the sampling time (2016 and 2017) were about 38 % dryer in the central part and 66 % more dry in the southern part, compared with the climate normal 1981–2010. The southern region is generally dryer than the central one. All information is based on station data from the INMET network (electronic supplement Table A01).

## 2.2 Soil sampling

Ninety percent of the ERA sites (minimum one hectare each;  $n = 26$ ) were sampled in triplicate (February and March 2016, weak wet; July and August 2016, extremely dry; February and March 2017, normal wet) to obtain a robust database. Locations 04 and 10 were sampled a fourth time in February 2018 to compensate previous access problems. All sampling spots were geo-referenced (handheld GPS/GLONASS receivers Garmin GPS 64s) with an accuracy of  $\pm 3$  m even under dense forest canopy. Litter material (ORG) was collected across the entire site with latex glove-protected hands into thoroughly cleaned cotton bags and closed tight until further processing. Mineral soil was sampled manually by soil auger (Sondaterra, Piracicaba, São Paulo State, Brazil) in two different depths (TOP: 0–20 cm,  $n = 79$ ; BOT: 30–50 cm,  $n = 80$ ) into Rilsan® polymer sampling bags after carefully removing surface litter, visible root material and small stones. Three spots were sampled at each site. Resulting samples (3 x TOP, 3 x BOT) were united to composite TOP and BOT samples per site. The auger was thoroughly cleaned between all individual samples. This procedure was repeated in all three campaigns. Use of disposable latex lab-gloves further reduced contamination risks during sampling. Soil humidity was measured in the field (TDR sensor, Delta-T Devices, United Kingdom).

## 2.3 Sample processing, soil solution pH, electrical conductivity and soil colour

Litter and mineral soil material were air-dried in the lab, crushed in an agate mortar and pestle, and (nylon) sieved to particles < 2 mm. Larger material (stones, root material) was discarded. The fine material was ground and milled to analytical size (< 63  $\mu\text{m}$ ) in a planetary ball mill (Pulverisette 7, Fritsch, Idar-Oberstein, Germany) and a rotating disc mill (RS 200, Retsch, Haan, Germany); both with agate grinding jars and balls. Sample powder was tested for effective grain size by sieving through nylon test sieves. All equipment was thoroughly cleaned after each sample.

Soil solution electrical conductivity ( $\lambda$  in  $\mu\text{S cm}^{-1}$ ) and pH-values ( $\text{pH}_{\text{iso}}$  and  $\text{pH}_{\text{calc}}$ ) were determined in the soil fraction < 2 mm. For each sample, 2-times 15.0 g of soil were weighed into two beakers (double determination) to be filled with 75 mL of deionized water and stirred for 1 hr. Conductivities were determined with calibrated 'cond 3110' electrodes (Meinsberg, Germany). In the same solution and a 0.01 mol CaCl<sub>2</sub> solution, pH was measured. Following 1 hr of sedimentation time, pH-values were determined in the supernatant solution with calibrated EGA 161 electrodes (Meinsberg, Germany), adapted to low-conductivity solutions.

Soil colours were determined from air-dried samples (< 2 mm) under constant light conditions using the Munsell soil colour charts (1992) with reference to hue, value and chroma (electronic supplement Table A02).

## 2.4 Elemental analysis (CNS)

Twenty (20.0) milligrams of analytical grade ORG, TOP and BOT aliquots of each pulverized sample ( $n = 244$ ) were weighed into small tinfoil containers using an analytical balance (Sartorius Micro Pro 11, Göttingen, Germany). 60 mg of tungsten<sup>VI</sup>oxide catalyst was added and the tinfoil tightly sealed. This sealed container was placed into the Elemental analyser (El Cube, Elementar Analysensysteme, Hanau, Germany) for subsequent determination of total carbon (C<sub>t</sub>), total nitrogen (N) and total sulfur (S) concentrations. To determine total organic carbon (C<sub>org</sub>), another aliquot was treated with a drop of 10 % HCl solution. After gas release (CO<sub>2</sub> ↑), the sample was treated as before. Resulting C-concentration equals the amount of C<sub>org</sub>; prerequisite for calculating C<sub>org</sub>/N ratios. Calibration and daily factor determination were done using 4-aminobenzenesulfonic acid. Certified reference material (ORIS, BHA-1) and our in-house reference material for tropical soil (BraSol) were added as unknown samples and treated accordingly. Quantification limits were C: 0.040, N: 0.003, S: 0.003 wt-%. Sample duplicates reproduced identical values for carbon (RSD  $\leq 1\%$ ); standard deviations remained under 5% RSD for nitrogen and sulfur. Reference material concentrations were always reproduced within their recommended ranges. See Matschullat et al. (2018) for more details.

## 2.5 Statistical evaluation

Non-parametric techniques were used to calculate basic descriptive statistics (Hall and Sheather, 1988; Sheather and McKean, 1987). Graphics were drawn with the program R (3.4.3) using the package *tidyverse*, including *ggplot2*.

# 3 Results and discussion

## 3.1 pH-values and electrical conductivity

TOP soil pH-values were acidic to strongly acidic with median lows of 4.2 in the dry season ( $\text{pH}_{\text{H}_2\text{O}}$ ; Table 1). Average BOT  $\text{pH}_{\text{H}_2\text{O}}$  values of 4.3–4.6 in forest-covered soil; 4.6–4.9 in post-forest soil point at reduced weathering rates in lower soil horizons. Forest soils were more acidic throughout in both TOP and BOT levels ( $\Delta \geq 0.3$   $\text{pH}_{\text{H}_2\text{O}}$  units) as compared to post-forest soils. This is likely due to much stronger rhizosphere metabolism in forests and considerably lower biomass in post-forest soils (Jones et al., 2003). Considerable cation exchange capacity throughout can be derived from the delta pH between its determination in water and in CaCl<sub>2</sub> (Mekaru and Uehara, 1972; Sanchez, 2019: 203; Table 1). Individual liming of agricultural soil cannot be excluded, resulting in higher pH-values at those sites (Figures 2, 3). Independent of land cover, intra-annual dynamics are high with a  $\text{pH}_{\text{H}_2\text{O}}$  delta of up to 0.7 units or  $63 \mu\text{mol H}^+ \text{L}^{-1}$  between (extreme) dry season and wet season (TOP); weaker in BOT material ( $\Delta 0.3$   $\text{pH}_{\text{H}_2\text{O}}$  units; Table 1; Figure 2). Highly reduced hydrolysis during the dry season liberates less buffering cations (Ca, Mg) from the upper soil layers; soil solution pH drops. This effect is even noticeable in  $\text{pH}_{\text{CaCl}_2}$  determinations, yet more subtle. Intra-annual soil pH swings should influence nutrient availability and microbial community dynamics. Relevant differences emerge between the central and southern parts of Amazonas state with considerably higher pH-values in TOP soil material after deforestation in the south (Figure 2). This change signal is visible in BOT soil, too, yet not as pronounced.

Soil solution electrical conductivity ( $\lambda$  in  $\mu\text{S cm}^{-1}$ ) serves as proxy for solute transport in water-filled pore space (WFPS).  $\lambda$  was significantly higher in the dry season as compared to the wet season, and forest soil showed consistently higher  $\lambda$  than post-forest soil (Figure 3), corroborating the pH-value results. BOT material presents even lower soil solution electrical conductivities ( $27\text{--}34 \mu\text{S cm}^{-1}$  in forest soil;  $17\text{--}26 \mu\text{S cm}^{-1}$  in post-forest soil; ranges represent intra-annual variation). The median maximum difference between dry and wet season was  $50 \mu\text{S cm}^{-1}$  (Table 1; Figure 2).

Decreasing soil pH with increasing electrical conductivities in the dry season are clearly noticeable. Yet, their effect on soil fertility and element dynamics may be too small to be of practical relevance at any given site.  $\lambda$  is considerably more dynamic in forest soil as compared to post-forest soil (Table 1, Figure 3 and electronic supplement Table A02). This difference may result from soil physical changes such as decreasing porosity and increasing density after deforestation.

Materials dominantly displayed light yellowish brown (10YR 6/4) colour characteristics (electronic supplement Table A02), indicative of Fe oxihydroxides (hematite, goethite). Typical humic A-horizons (Ah) were generally very thin. The deeper mineral soil layer (BOT) always showed slightly lighter and more reddish colours (very pale brown, 10YR 7/4; indicating prevalence of goethite) with significantly different chemical composition from TOP soil material (Tables 1–4).

### 3.2 ORG material carbon, nitrogen and sulfur (CNS)

Soil litter (ORG) accumulation in the Amazon basin changes radically between dry and wet seasons ( $\Delta$  of up to 40 cm). We did not perform quantitative measurements, yet data from Sanches et al., (2008) and Valentini et al., (2008) corroborate this observation with intra-annual variation factors of 3 to 4. Due to an unusually strong ENSO event from 2015 to 2017 (Jiménez-Muñoz et al., 2016), seasonal differences were particularly pronounced between our sampling campaigns Ph\_02 and Ph\_03. Litter accumulation varied of a few centimeters (Ju-

ly/August) to several decimeters thickness (February/ March). Litter material always was much thicker under forest canopy as compared to any post-forest land cover.

The litter layer showed median concentrations between 34 and 49 wt.-% (C), 27 to 46 wt.-% ( $C_{org}$ ), 0.6 to 2.3 wt.-% (N), 0.09 to 0.23 wt.-% (S) and  $C_{org}/N$  ratios between 18 and 65 (electronic supplement Table A02). A more differentiated view is needed to see regional and temporal differences. Significant difference emerged for CNS with higher values in the central and rainier part (Table 2). Independent of geographical and morphological position, forest litter shows lower C and N values than post-forest material. In the central part, post-forest land cover presents higher C and N concentrations than forest soil litter, while lower ones were determined in post-forest litter in the south. Intra-annual relative differences of  $\pm 5\%$  from the median value occur, with a clear tendency to higher values in the rainy season; again independent of land use (electronic supplement Table A02). Forest litter clearly shows faster decomposition with much lower  $C_{org}/N$  ratios as compared to post-forest soils. This is particularly strong in the southern (drier) part and additionally supported by the comparison between wet and dry season (Table 2). This seasonal shift is accompanied by CNS losses that are particularly high for N (about -20 %). In general, losses are higher in post-forest material (Table 4).

### 3.3 Mineral soil carbon, nitrogen and sulfur

Carbon (total and organic), nitrogen and sulfur were fully quantifiable in all samples. A non-differentiated comparison (central vs. southern part, forest vs. post-forest sites) of the new ERA data with global (UCC, WSA, WISE30sec) and European (FOREGS, GEMAS) average data (Table 3 for references) show that upper crustal data (UCC) are inappropriate for comparison, that world soil average (WSA) sulfur data lie far above both European soil data (FOREGS, GEMAS) and the Amazon basin soils, while the new ferralsol data (FR.) from the WISE30sec approach (Batjes, 2016) show similar values for  $C_{org}$  and N (Table 3). European soil CNS averages (FOREGS, GEMAS) are in very good agreement with the new Amazonas data.

Intra-annual changes emerge between both land-cover types with generally stronger losses in post-forest soils, when comparing the two extreme seasons Ph\_02 and Ph\_03 (Table 4). Inverse conditions emerge for litter material (ORG) as compared to the mineral soil. ORG showed lower concentrations throughout in the extreme dry season (Ph\_02) as compared to the wet season (Ph\_03), while TOP and BOT material mostly showed no change or slightly decreasing ( $\varnothing$  -5 to -20 %) concentrations from the extreme dry to the wet season (Table 4). Only TOP soil in the central part of the basin showed increasing concentrations between the seasons ( $\varnothing$  +5 to +15 %).

Related results for sulfur are non-conclusive. The C/S ratio is normal (about 200 in TOP; Blume et al., 2016: 56 ff.). While seasonal changes clearly occur (Table 3), they show partly contradictory behavior in the three different materials. The dominant oxisols in upland (terra firme) environments of the Amazon basin yield above-average amounts of clay minerals (median 42%; electronic supplement Table A02) and yet show very good drainage characteristics under forest land-cover (Table 1 with  $\lambda$  as proxy for drainage). Under oxidizing conditions, available dissolved sulfur (as sulfate) would likely bond to abundant Fe in the system, forming ferrous sulfate and not wash out.

**TOP mineral soil (0–20 cm).** Although Sanchez (1977) reported 2.01 wt.-% of organic carbon in Brazilian oxisols, corroborated by work from Sanchez (2019: 264), the misleading notion that tropical soils are generally nutrient poor and show low CNS values is still widespread. Organic carbon dominated the C species (median 81

% for all data; Table 2). TOP material C is likely younger (years) than C in lower soil parts (decades to centuries in BOT and beyond; Cuevas, 2001; Schmidt et al., 2011; Trumbore and Carmargo, 2009). The south of the basin presented lower total  $C_{org}$  and N values than its central part, and forest soils generally show higher values than post-forest soils, independent of geographical position (Figures 4 and 5). This is less pronounced to invisible in the south, likely reflecting an adaptation to earlier deforestation. Major deforestation started only after the construction of the Transamazônica Highway (since 1972) with significant migration and settlement throughout the basin (Fearnside, 2005). Therefore, more pronounced alterations in the C soil balance should have occurred only within the last  $\pm 50$  years. Related differences are very visible in the central part with losses of  $C_i$  (-13%),  $C_{org}$  (-15%) and N (-12%), whereas the southern parts do not show any significant difference between TOP soil CNS concentrations under forest canopy or post-forest land use (Table 4). We assume that this is due to the fact that the south faces much more human impact and remaining forest stretches are influenced by edge effects (Barros and Fearnside, 2016). This hypothesis is corroborated by our data from Apuí (Loc. 07, 08) and Lábrea (Loc. 10) for more natural conditions versus those from Humaitá (Loc 09) and Boca do Acre (Loc 13) with more disturbed conditions. Observed seasonal dynamics are much stronger at the more natural-condition sites (electronic supplement Table A02).

While CNS decreased from wet to dry season in organic litter material (= biodegradation and export), TOP mineral soil shows differentiated behaviour.  $C_i$  and  $C_{org}$  increased in forest soil, and  $C_{org}$  decreased in post-forest soil, pointing at slower biogeochemical turnover in post-forest soil with reduced microbial activity and less pore space. Sinking pH-values likely inhibits microbial activity, too, enhancing possibly drought inhibition (Barbhuiya et al., 2004). Nitrogen decreased under both soil cover types, albeit stronger in post-forest soil. This observation has been made in both the central parts of the basin and in its south. In the south, differences between forested (large increase) and post-forest soils (moderate increase to decrease) corroborate the hypothesis of changes in biogeochemical metabolism between forested and post-forest soils (Table 4). It is very likely that plants, particularly trees take up the elements and soil serves as temporary storage.

**BOT mineral soil (30–50 cm).** Not surprisingly,  $C_{org}$  and N data show considerably lower concentrations in the BOT layer as compared to TOP material (Figures 4 and 5). Jobbágy and Jackson (2000) calculated the relative SOC amounts by depth. Their compilation resulted in roughly a factor of 2 between the layers equivalent to our TOP and BOT samples; similar to this work. CNS are lower in BOT than TOP and increase from wet to dry season under forest canopy, with much smaller increase values for post-forest soils (Table 4). It is noteworthy that these seasonal dynamics obviously influence the entire rhizosphere and are not restricted to the uppermost material with the highest root mass. The smaller increase in post-forest soil can be explained by considerably longer turnover rates due to relatively reduced soil biological metabolism (Rangel-Vasconcelos et al., 2015). This is corroborated by slightly lower  $C_{org}/N$  ratios in the BOT<sub>res</sub> materials (electronic supplement Table A02).

Given a time-lag maximum of several decades after deforestation only, distinctly lower values (ca. -20 %) for C and N in post-forest soil is quite a strong signal (Table 2). No significant change emerged for sulfur between forested and deforested soil, contradictory to results from McClung et al. (1959; cited in Sanchez, 2019), which may not apply due to their Cerrado-based approach. Our median values of all forested versus all post-forest sites deliver clear results, whereas individual sites may not always show conclusive results between dry and wet season samples (electronic supplement Table A02).



This comparison of averages (all forest, all post-forest sites) hides that the central and southern parts of the region behave differently, with the southern sites showing lower values for all four components, independent of land cover (Table 4, Figures 4 and 5). Yet, there is the distinct difference between forest and post-forest soil. In the central (wetter) part of the basin, decreases of -22 % C<sub>i</sub> and -13 % C<sub>org</sub>, -13 % N occurred. No significant change is visible in BOT material from the southern parts of the basin.

### 3.4 Upscaling

Based on ORG, TOP and BOT concentration data, material densities and estimated areas, we attempt upscaling our CNS results for one hectare of terra firme in the Amazon basin (Table 5; Figure 6).

Assuming a conservative annual average litter (ORG) thickness of 5 cm under forest canopy and of 1 cm at post-forest sites, and an average litter density of 0.03 g cm<sup>-3</sup> (Chojnacky et al., 2009), one hectare would generate a mass of 15,000 kg under forest canopy and 3000 kg on post-forest soil. Based on average CNS concentrations, pools would yield 6150/1260 kg of total carbon, 5550/1170 kg of C<sub>org</sub>, 240/42 kg of N, and 26/5 kg of S in forest/post-forest environments, respectively (Table 5; Figure 6). Obviously, already visible losses are in the order of magnitude of 60 % between forest and post-forest soil.

With an average TOP thickness of 20 cm (to stay in line with the sampling depth) and an average density of 1.3 g cm<sup>-3</sup> (Neves et al., 2003) each hectare of upland soil delivers about 2600 metric tons with pools of about 60 tons of C<sub>i</sub> (46 tons C<sub>org</sub>) in forest and 46 (40) tons in post-forest environments, 4.6/3.6 tons of N and 0.8/0.6 tons of S (Figure 6). The soils are generally highly acidic (Table 1). Higher seepage water availability in the wet season obviously discharges mobilizable cations, leading to lower conductivities, while these cations sorb onto soil particles in the dry season.

Using a similar mass-balance approach as for the TOP, a 20 cm-thick lamina of BOT material with likely slightly higher density (1.4 g cm<sup>-3</sup>), producing a total mass of 2800 tons per hectare, would yield pools of about 31 tons of C<sub>i</sub> (25 tons of C<sub>org</sub>), 2.2 tons of N and 0.6 tons of S in forested soil. Under post-forest conditions, values are 25 t C<sub>i</sub>, 22 t C<sub>org</sub>, 2.2 t N, and 0.6 t S (Figure 6). This is expectedly lower than in TOP soil, yet shows the relevance of deeper C dynamics (Jobbagy and Jackson, 2000; Schmidt et al., 2011).

Most root mass resides in the top 50 cm of the local soil profiles (Canadell et al., 1996; Schenk and Jackson, 2002; Sternberg et al., 1998; our own observations). Therefore, the combined TOP and BOT samples (with BOT calculated here to 30 cm thickness) should represent the bulk rhizosphere. Figure 6 shows the pool sizes for one hectare in comparison between forested and post-forested soil. The CNS pools are relatively high with about 110 t of C<sub>i</sub>, 90 t of C<sub>org</sub>, 8 t of N, and 2 t of S per hectare forest soil. Pools in post-forest soil are roughly 20 % lower. Given that such loss occurred within a maximum time of 50 years since deforestation (at some sites, deforestation happened just a short time ago), similar effect must be expected in other parts of the Amazon basin that are under deforestation risk in the near future.

## 4 Conclusions

The initially formulated key questions can be answered as follows:

- What are CNS concentrations in Amazon basin soils – and how do these relate to other world soils?

Surprisingly, average CNS concentration (in wt-% TOP<sub>Forest</sub>: C<sub>i</sub> 2.2, C<sub>org</sub> 1.8, N 0.17, S 0.03) are similar to those of Europe with Mediterranean to sub-polar climatic conditions (mostly temperate; in wt-% TOP FOREGS: C<sub>i</sub> 2.2, C<sub>org</sub> 1.7, N 0.17, S 0.02). The range of Amazon basin CNS values appears to be considerably more narrow; logical given more homogenous climatological and lithological conditions.
- Are there differences in nutrient status and carbon between forested and post-forest land? Differentiation is needed between the central and southern parts of the basin, and between the upper (TOP) and lower (BOT) soil layers within the rhizosphere. C<sub>i</sub> and C<sub>org</sub> are relatively enriched in central Amazonas forest soil (TOP and BOT), while depleted in litter material (ORG) in comparison with post-forest soil (Table 2). In the southern parts of the basin, no conclusive or significant difference emerges for CNS in mineral soil, while post-forest soils are slightly enriched in the ORG layer. Such difference between the more wet and relatively less disturbed sites in the central part and the south suggest that edge effects already dominate the southern locations. The other, most likely influential driver is the underlying lithology with younger sedimentary material in the central part but much older and metamorphic and magmatic materials in the southern part.
- Is the CNS status similar throughout the year or do we see intra-annual dynamics? Such dynamics are visible, albeit subtle. Between wet (Phase 03) and dry season (Phase 02) as the two extremes in our study, ORG material shows losses throughout; on average more so at post-forest sites. Gains emerged generally in mineral soil with mostly stronger signals in forest than post-forest soil (Table 4). Again, significant differences emerged between the central and southern parts of the basin with stronger gains in the south in forest TOP soil. A strong gain in total S appeared in BOT of the central part as an anomaly (+58%). Such intra-annual dynamics, very likely soil water-dependent, suggest significant influence of future hydrological changes in the basin, as suggested by various authors (Lenton et al., 2008).
- How do mineral soil CNS concentrations relate to the organic litter layer? On average, ORG material shows higher concentrations of C<sub>i</sub> and C<sub>org</sub>, of N and of S than mineral soil (Table 2). A distinction emerged between the central and southern parts. The highest ratios occur for C<sub>i</sub> and C<sub>org</sub>. In the central part, these ratios are lower for forest sites than for post-forest ones, while there is no significant difference in the southern part. This finding may corroborate the previous hypothesis that edge effects already dominate soil chemistry in this sub region.
- Is the hydrological difference between the more humid central part of the basin and its southern “shoulder” relevant? The central parts appear to be better buffered against change as compared to the southern part, which already is significantly more dry. Since deforestation in the south is partly extreme (exceeding 90 %), such evidence suggests that increasing drought conditions will exacerbate the situation, leading to even more drought in the dry season.
- Which consequences may future increasing drought conditions have for CNS behaviour in Amazon basin soils? Given our observation of considerably lower average pH<sub>lim</sub> values and higher electrical conductivity in the dry season as compared to wet seasons, it can be inferred that the dry-season accumulation of (organic) acids with related liberation of easily dissolvable cations will increase chemical erosion and subsequent nutrient loss. This observation is more pronounced in forest soil as compared to post-forest soil, likely an effect of reduced porosity and water conductivity in post-forest soils. Given the initial nutrient scarcity of inner humid-tropical soils, increased loss is certainly unwanted.

**Acknowledgements.** This work is part of the bi-national project EcoRespira-Amazon (<http://blogs.hrz.tu-freiberg.de/ecorespira/>) and has been generously supported by the German-Brazilian cooperation programme (DAAD 57204144). On the German side, the Federal Ministry for Economic Cooperation and Development (BMZ) with Deutsche Gesellschaft für Internationale Zusammenarbeit (GIZ) and the German Academic Exchange Service (DAAD) financed and organized the project under the umbrella of Nova Parcerias (NoPa2) since 2015. The Federal Ministry for Science, Technology, Innovation and Communication (MCT), the Federal Ministry of Education (MEC) and the Coordenação de Aperfeiçoamento de Pessoal de Nível Superior (CAPES) were responsible on the Brazilian side.

The authors are most thankful for this financial support, without which this and several other studies within the project would not have been possible. We also wish to acknowledge infrastructural and technical support from Embrapa in Manaus and Porto Velho as well as the hands-on help from Ednilson Alves Figueiredo, Joel Gomes, Marcelo Renan de Oliveira Teles, Cintia R. Souza (all Embrapa Amazônia Ocidental) and Kikue Moroya from IPAAM. Last but not least, our appreciation goes to Kamal Zurba and Thomas Drauschke for their dedicated field work (manual soil drilling in Amazon Basin soils is no fun), to Karsten Gustav (pH, EC, soil colour) and Richard Hammig (TPI) for their Bachelor thesis work, and to the Freiberg laboratories' team, namely Dr. Alexander Plessow with Elvira Rüdiger (EA), for excellent analytical work and lab quality control. Thank you ALL.

## References

- Aragão, L.E.O.C. The rainforest's water pump. *Nature* 489: 217-218; doi 10.1038/nature11485, 2012.
- Baldock, J.A. Composition and cycling of organic carbon in soil. In: Marschner, D., Rengel, Z. (Eds.) *Nutrient cycling in terrestrial ecosystems*. *Soil Biol* 10: 1-35; Springer Verlag, 2007.
- Barbhuiya, A.R., Arunachalam, A., Pandey, H.N., Arunachalam, K., Khan, M.L., Nath, P.C. Dynamics of soil microbial biomass C, N and P in disturbed and undisturbed stands of a tropical wet-evergreen forest. *Eur J Soil Biol* 40: 113–121; doi 10.1016/j.ejsobi.2005.02.003, 2004.
- Barros, H.S., Fearnside, P.M. Soil carbon stock changes due to edge effects in central Amazon forest fragments. *Forest Ecol Manage* 379: 30-36; doi 10.1016/j.foreco.2016.08.002, 2016.
- Batjes, N.H. Harmonized soil property values for broad-scale modelling (WISE30sec) with estimates of global soil carbon stocks. *Geoderma* 269: 61-68; doi 10.1016/j.geoderma.2016.01.034, 2016.
- Blume, H.P., Brümmer, G.W., Fleige, H., Horn, R., Kandeler, E., Kögel-Knabner, I., Kretzschmar, R., Stahr, K., Wilke, B.M. *Scheffer/Schachtschabel Soil Science*. Springer Verlag, 630 p. doi 10.1007/978-3-642-30942-7, 2016.
- Bohn, H.L., McNeal, B.L., O'Connor, G.A. *Soil chemistry*. 3<sup>rd</sup> ed. John Wiley; 320 p., page 156, 2001.
- Canadell, J., Jackson, R.B., Ehleringer, J.R., Mooney, H.A., Sala, O.E., Schulze, E.D. Maximum rooting depth of vegetation types at the global scale. *Oecol* 108: 583-595; doi 10.1007/BF00329030, 1996.
- Cerri, C.C., Bernoux, M., Cerri, C.E.P., Lal, R. Challenges and opportunities of soil carbon sequestration in Latin America. In: Lal, R., Cerri, C.C., Bernoux, M., Etchevers, J., Cerri, E. (Eds.) *Carbon sequestration in soils of Latin America*. Food Products Press, New York, pages 41-47; doi 10-1300/5755\_02, 2006a.
- Cerri, C.E.P., Cerri, C.C., Bernoux, M., Volkoff, B., Rondón, M.A. Potential of soil carbon sequestration in the Amazonian tropical rainforests. In: Lal, R., Cerri, C.C., Bernoux, M., Etchevers, J., Cerri, E. (Eds.) *Carbon se-*

- questration in soils of Latin America. Food Products Press, New York, pages 245-266; doi 10-1300/5755\_12, 2006b.
- Chojnacky, D., Amacher, M., Gavazzi, M. Separating duff and litter for improved mass and carbon estimates. *South J Appl Forest* 33, 1: 29-34, 2009.
- CPRM. Mapa geológico do Estado do Amazonas (Geological map of Amazonas state). [www.cprm.gov.br](http://www.cprm.gov.br). Last access 02-2019, 2005.
- Cuevas, E. Soil versus biological controls on nutrient cycling in terra firme forests. In: McClain, M.E., Victoria, R.L., Richey, J.E. (Eds.) *The biogeochemistry of the Amazon basin*. Oxford Univ Press; 53-67; ISBN0-19-511431-0, 2001.
- Davidson, E.A., de Araújo, A.C., Artaxo, P., Balch, J.K., Foster Brown, I., Bustamante, M.M.C., Coe, M.T., DeFries, R.S., Keller, M., Longo, M., Munger, J.W., Schroeder, W., Soares-Filho, B.S., Souza, C.M., Wofsy, S.C. The Amazon basin in transition. *Nature* 481, 7381: 321-328; doi 10.1038/nature10717, 2012.
- Fearnside, P.M. Deforestation in Brazilian Amazonia: History, rates and consequences. *Conserv Biol* 19, 3: 680-688; doi 10.1111/j.1523-1739.2005.00697.x, 2005.
- Fearnside, P.M. Brazil's Amazonian forest carbon: the key to southern Amazonia's significance for global climate. *Reg Environ Change* 18: 47-61; doi 10.1007/s10113-1007-2, 2018.
- Glaser, B., Birk, J. State of the scientific knowledge on properties and genesis of anthropogenic dark earths in central Amazonia (terra preta do índio). *Geochem Cosmochim Acta* 82: 39-51; doi 10.1016/j.gca.2010.11.029, 2012.
- Glaser, B., Guggenberger, G.Z., Zech, W. Identifying the Pre-Columbian anthropogenic input on present soil properties of Amazonian dark earths (Terra Preta). In: Glaser, B., Woods, W. (Eds.) *Amazonian dark earths: Explorations in space and time*. Springer, Heidelberg: 145 – 158, 2004.
- Hall, P., Sheather, S.J. On the distribution of a studentized quantile. *J Royal Statist Soc Ser B50*: 380-391, 1988
- Hubbell, S.P., He, F., Condit, R., Borda-de-Água, L., Kellner, J., ter Steege, H. How many tree species are there in the Amazon and how many of them will go extinct? *PNAS* 105, 1: 11498-11504; doi 10.1073/pnas.0801915105, 2008.
- Irion, G. Soil infertility in the Amazonian Rain Forest. *Naturwiss* 65, 10: 515-519, 1978.
- Jiménez-Muñoz, J.C., Mattar, C., Barichivich, J., Santamaria-Artigas, A., Takahashi, K., Malhi, Y., Sobrino, J.A., van der Schrier, G. Record-breaking warming and extreme drought in the Amazon rainforest during the course of El Niño 2015–2016. *Nature Sci Rep* 6: 33130, doi 10.1038/srep33130, 2016.
- Jobbágy, E.G., Jackson, R.B. The vertical distribution of soil organic carbon and its relation to climate and vegetation. *Ecol Appl* 10, 2: 423–436; doi 10.1890/1051-0761(2000)010, 2000.
- Jones, D.T., Susilo, F.X., Bignell, D.E., Hardiwinoto, S., Gillison, A.N., Eggleton, P. Termite assemblage collapse along a land-use intensification gradient in lowland central Sumatra, Indonesia. *J Appl Soil Ecol* 40: 380-391; doi 10.1046/j.1365-2664.2003.00794.x, 2003.
- Juo, A.S.R., Franzluebbers, K. *Tropical soils. Properties and management for sustainable agriculture*. Oxford University Press, 281 p., 2003.
- Lenton, T.M., Held, H., Kriegler, E., Hall, J.W., Lucht, W., Rahmstorf, S., Schellnhuber, H.J. Tipping elements in the Earth's climate system. *PNAS* 105, 6: 1786–1793; doi 10.1073/pnas.0705414105, 2008.
- Lewis, S.L., Brando, P.M., Phillips, O.L., van der Heijden, G.M.F., Nepstad, D. The 2010 Amazon drought. *Science* 331: 554; doi 10.1126/science.1200807, 2011.

- Longobardi, P., Montenegro, A., Beltrami, H., Eby, M. Deforestation-induced climate change: Effects of spatial scale. *PLOS One* 11, 4: e0153357; doi 10.1371/journal.pone.0153357, 2016.
- Marengo, J.A. On the hydrological cycle of the Amazon Basin: A historical review and current state-of-the-art. *Rev Bras Meteorol* 21, 3: 1-19; 2006.
- Matschullat, J., Reimann, C., Birke, M., dos Santos Carvalho, D., GEMAS Project Team. GEMAS: CNS concentrations and C/N ratios in European agricultural soil. *Sci Total Environ* 627: 975-984, 2018.
- McClain, M.E., Victoria, R.L., Richey, J.E. (Eds.) *The biogeochemistry of the Amazon basin*. Oxford Univ Press; 365 p., 2001.
- McClung, A.C., de Freitas, L.M.M., Lott, W.L. Analysis of several Brazilian soils in relation to plant responses to sulfur. *Soil Sci Soc Am Proc* 23: 221-224; doi 10.2136/sssaj1959.03615995002300030020x, 1959.
- McGrath, D., Smith, C.K., Gholz, H.L., de Assis Oliveira, F. Effects of land-use change on soil nutrient dynamics in Amazonia. *Ecosys* 4: 625-645; doi 10.1007/s10021-001-0033-0, 2001.
- McNeill, A., Unkovich, M. The nitrogen cycle in terrestrial ecosystems. In: Marschner, D., Rengel, Z. (Eds.) *Nutrient cycling in terrestrial ecosystems*. *Soil Biol* 10: 37-64; Springer Verlag, 2007.
- Mekaru, T., Uehara, G. Anion adsorption in ferruginous tropical soils. *Soil Sci Soc Am Proc* 36: 296-300, 1972.
- Munsell A.H. *Munsell soil colour charts*. Macbeth Publishers, New York, 1992.
- Nagy, L., Forsberg, B., Artaxo, P. Interactions between biosphere, atmosphere and human land use in the Amazon basin. *Ecol Studies* 227: 477 p.; Springer Science Publications, 2016.
- Neves, C.S.V.J., Feller, C., Guimarães, M.F., Medina, C.C., Tavares Filho, J., Fortier, M. Soil bulk density and porosity of homogeneous morphological units identified by the cropping profile method in clayey oxisols in Brazil. *Soil Tillage Res* 71, 2: 109-119; doi 10.1016/S0167-1987(03)00023-0, 2003.
- Quesada, C.A., Lloyd, J., Schwarz, M., Patiño, S., Baker, T.R., Czimczik, C., Fyllas, N.M., Martinelli, L., Nardoto, G.B., Schmerler, J., Santos, A.J.B., Hodnett, M.G., Herrera, R., Luizão, F.J., Arneeth, A., Lloyd, G., Dezzio, N., Hilke, I., Kuhlmann, I., Raessler, M., Brand, W.A., Geilmann, H., Moraes Filho, J.O., Carvalho, F.P., Araujo Filho, R.N., Chaves, J.E., Cruz Junior, O.F., Pimentel, T.P., Paiva, R. Variations in chemical and physical properties of Amazon forest soils in relation to their genesis. *Biogeosci* 7: 1515-1541; doi 10.5194/bg-7-1515-2010, 2010.
- Rangel-Vasconcelos, L.G.T., Zarin, D.J., de Assis Oliveira, F., Silva Vasconcelos, S., Reis de Carvalho, C.J., de Lourdes Silva Santos, M.M. Effect of water availability on soil microbial biomass in secondary forest in eastern Amazonia. *Rev Bras Ciencia Solo* 39: 377-384; doi 10.1590/01000683rbc20140135, 2015.
- Reid, P.C., Hari, R.E., Beaugrand, G., Livingstone, D.M., Marty, C., Straile, D., Barichivich, J., Goberville, E., Adrian, R., Aono, Y., Brown, R., Foster, J., Groisman, P., Hélaouët, P., Hsiung Hsu, H., Kirby, R., Knight, J., Kraberg, A., Li, J., Lo, T.T., Myneni, R.B., North, R.P., Pounds, J.A., Sparks, T., Stübi, R., Tian, Y., Wiltshire, K.H., Xiao, D., Zhu, Z. Global impacts of the 1980s regime shift. *Global Change Biol* 22, 2: 682-703; doi 10.1111/gcb.13106, 2015.
- Reimann, C., Caritat, P de. *Chemical elements in the environment. Factsheets for the geochemist and environmental scientist*. Springer, New York; 398 p., 1998.
- Reimann, C., Birke, M., Demetriades, A., Filzmoser, P., O'Connor, P. *Chemistry of Europe's Agricultural Soils, Part A. Methodology and Interpretation of the GEMAS Data Set*. *Geol Jb B* 102: 523 p.; ISBN 978-3-510-96846-6, 2014.
- Richter, D.D., Babbar, L.I. Soil diversity in the tropics. *Adv Ecol Res* 21: 315-389, 1991.

- Roosevelt, A.C. The Amazon and the Anthropocene: 13,000 years of human influence in a tropical rainforest. *Anthropocene* 4: 69-87; doi 10.1016/j.ancene.2014.05.001, 2013.
- Rosa, I.M.D., Smith, M.J., Wearn, O.R., Purves, D., Ewers, R.M. The environmental legacy of modern tropical deforestation. *Current Biol Rep* 26: 2161-2166; doi 10.1016/j.cub.2016.06.013, 2016.
- Ross, J.L.S. *Ecogeografia do Brasil. Subsídios para planejamento ambiental*. Oficina de textos, São Paulo; 208 p.; ISBN 85-86238-60-0 (in Portuguese), 2006.
- Rudnick, R.L., Gao, S. Composition of the continental crust. In: Holland, H.D., Turekian, K.K. (Eds.) *Treatise on geochemistry* 2<sup>a</sup> ed., chapter 4.1: 51 p. ISBN: 978-0-08-098300-4; doi 10.1016/B978-0-08-095975-7.00301-6, 2014.
- Salminen, R. (Ed) *FOREGS. Geochemical atlas of Europe. Part 1: Background information, methodology and maps*. Geol Surv Finland, Espoo; 525 p; ISBN 951-690-921-3, 2005.
- Sanches, L., Valentini, C.M.A., Borges Pinto Jr, O., Souza Nogueira, J., Vourlitis, G.L., Sacardi Biudes, M., da Silva, C.J., Bambi, P., de Almeida Lobo, F. Seasonal and interannual litter dynamics of a tropical semideciduous forest of the southern Amazon Basin, Brazil. *J Geophys Res* 113: G04007; doi 10.1029/2007JG000593, 2008.
- Sanchez, P.A. *Properties and management of soil in the tropics*. Wiley Interscience, New York; cited in Bohn et al. (2001), 1977.
- Sanchez, P.A. *Properties and management of soil in the tropics*. 2<sup>a</sup> ed, 666 p. Cambridge Univ Press, New York; ISBN 978-1-107-17605-8, 2019.
- Schenk, H.J., Jackson, R.B. The global biogeography of roots. *Ecol Monogr* 72, 3: 311-328; doi 10.1890/0012-9615(2002)072, 2002.
- Schmidt, M.W.I., Torn, M.S., Abiven, S., Dittmar, T., Guggenberger, G., Janssens, I.A., Kleber, M., Kögel-Knabner, I., Lehmann, J., Manning, D.A.C., Nannipieri, P., Rasse, D.P., Weiner, S., Trumbore, S.E. Persistence of soil organic matter as an ecosystem property. *Nature* 478: 49-56, 2011.
- Sheater, S.J., McKean, J.W. A comparison of testing and confidence intervals for the median. *Stat Probabil Lett* 6: 31-36; doi 10.1016/0167-7152(87)90055-1, 1987.
- Shukla, J., Nobre, C., Sellers, P. Amazon deforestation and climate change. *Science* 247: 1322-1325, 2008.
- Sternberg, L. da S.L., Green, L., Moreira, M.Z., Nepstad, D., Martinelli, L.A., Victória, R. Root distribution in an Amazonian seasonal forest as derived from  $\delta^{13}\text{C}$  profiles. *Plant Soil* 205: 45-50, 1998.
- Trumbore, S., Barbosa de Camargo, P. Soil carbon dynamics. In: *Amazonia and global change*. *Geophys Monograph Ser* 186: 451-462; doi 10.1029/2008GM000741, 2009.
- Valentini, C.M.A., Sanches, L., de Paula, S.R., Vourlitis, G.L., de Souza Nogueira, J., Pinto Jr, O.B., de Almeida Lobo, F. Soil respiration and aboveground litter dynamics of a tropical transitional forest in northwest Mato Grosso, Brazil. *J Geophys Res* 113: G00B10; doi 10.1029/2007JG000619, 2008.

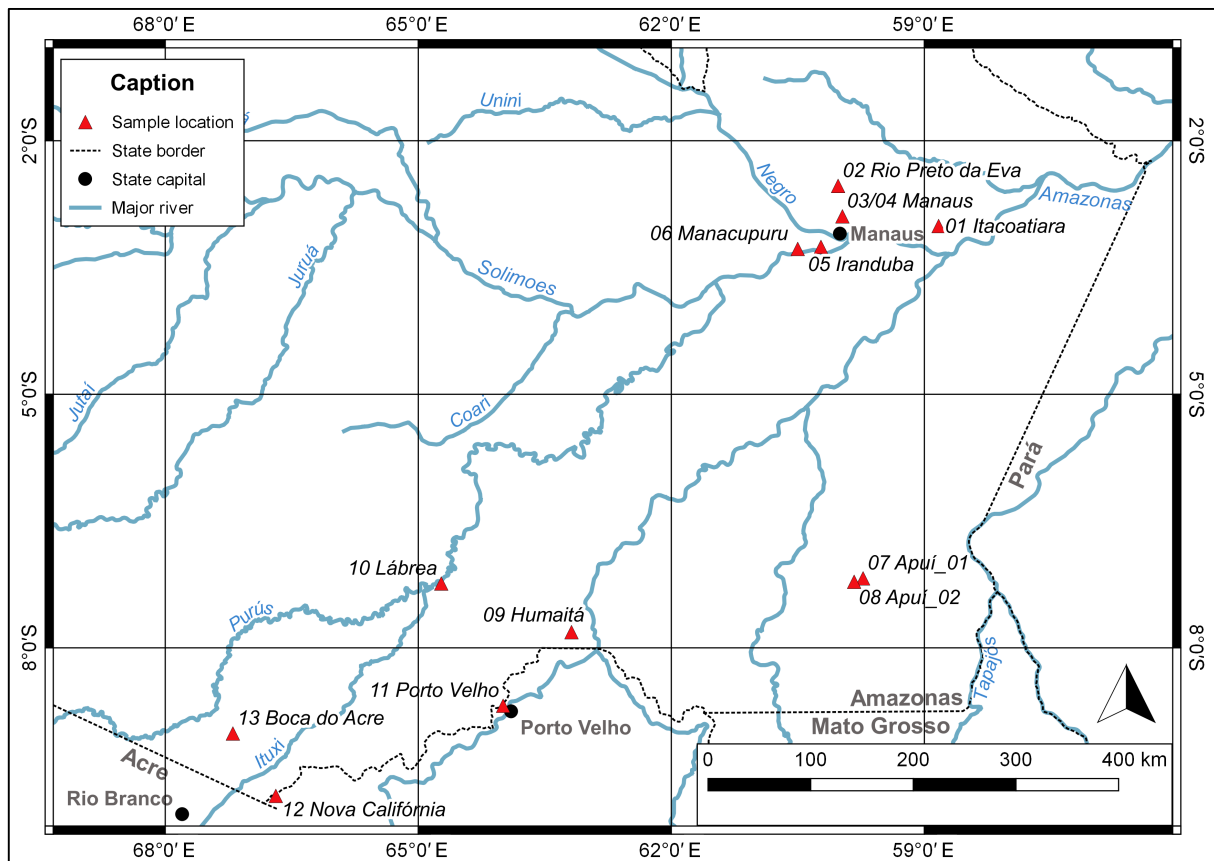

Figure 1. Location map Amazon basin (based on QGIS: 2.18.14 Las Palmas)

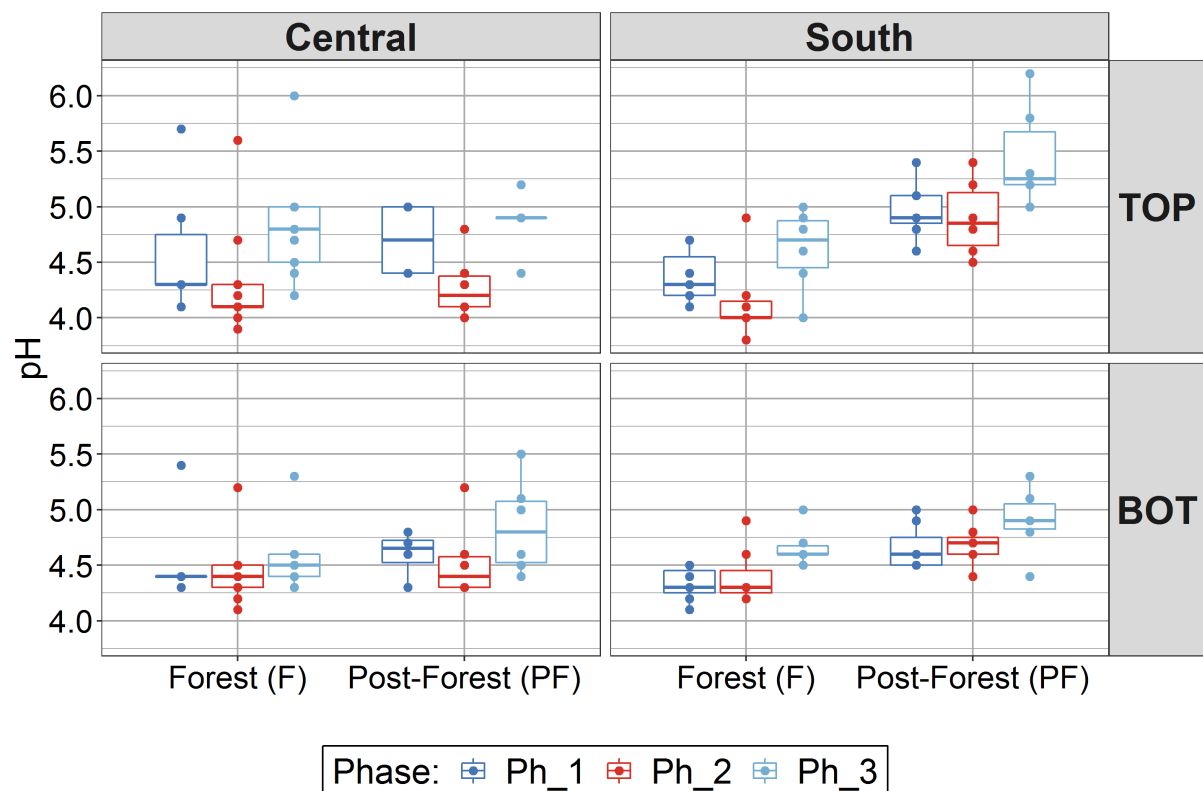

Figure 2. Boxplots show seasonal  $\text{pH}_{\text{H}_2\text{O}}$  dynamics in Amazonas upland soils, differentiated by region (central and south) as well as soil depth (TOP, BOT). See text for details

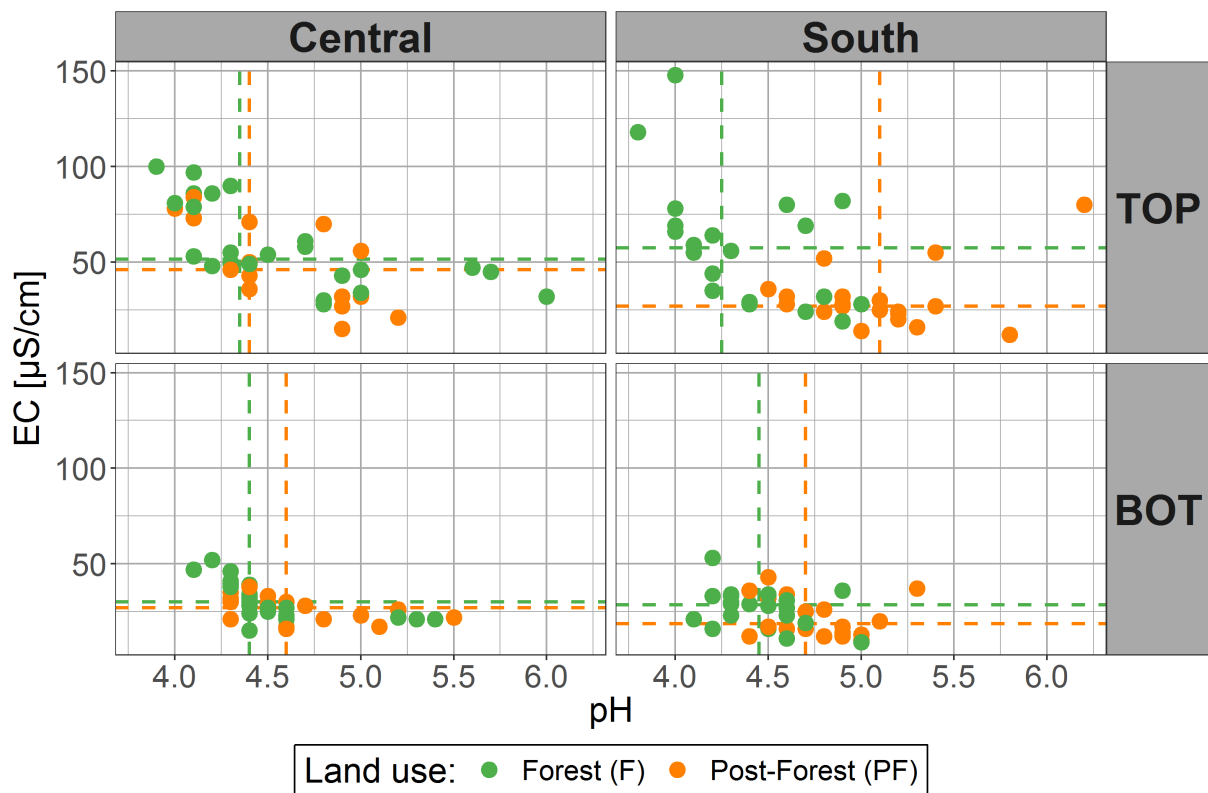

Figure 3. Soil solution electrical conductivity ( $\rightarrow$ ) versus pH-value ( $\text{pH}_{\text{soil}}$ ) in TOP and BOT samples from all ERA sites, differentiated by the central and southern locations and by forest (F) and post-forest (PF) land use

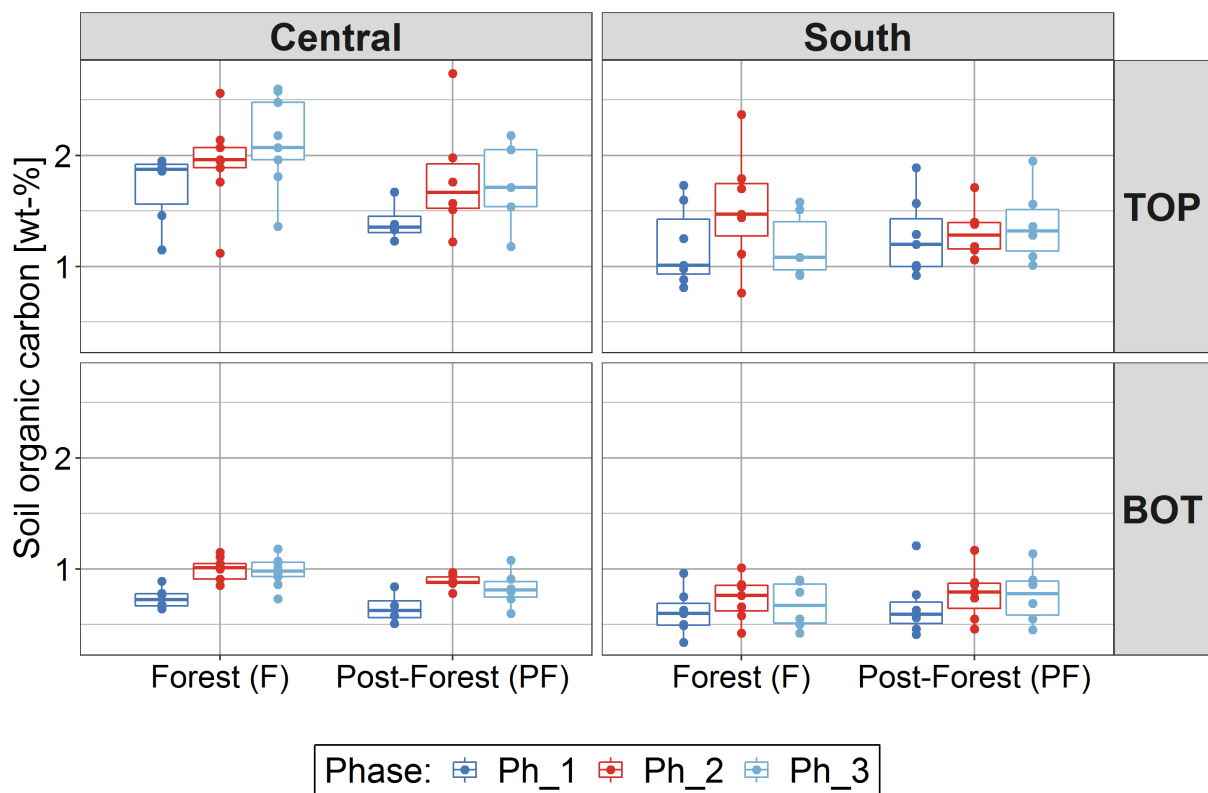

Figure 4. Soil organic carbon boxplots show seasonal dynamics relative to Amazonas region (central and south) as well as soil depth (TOP, BOT). See text for details



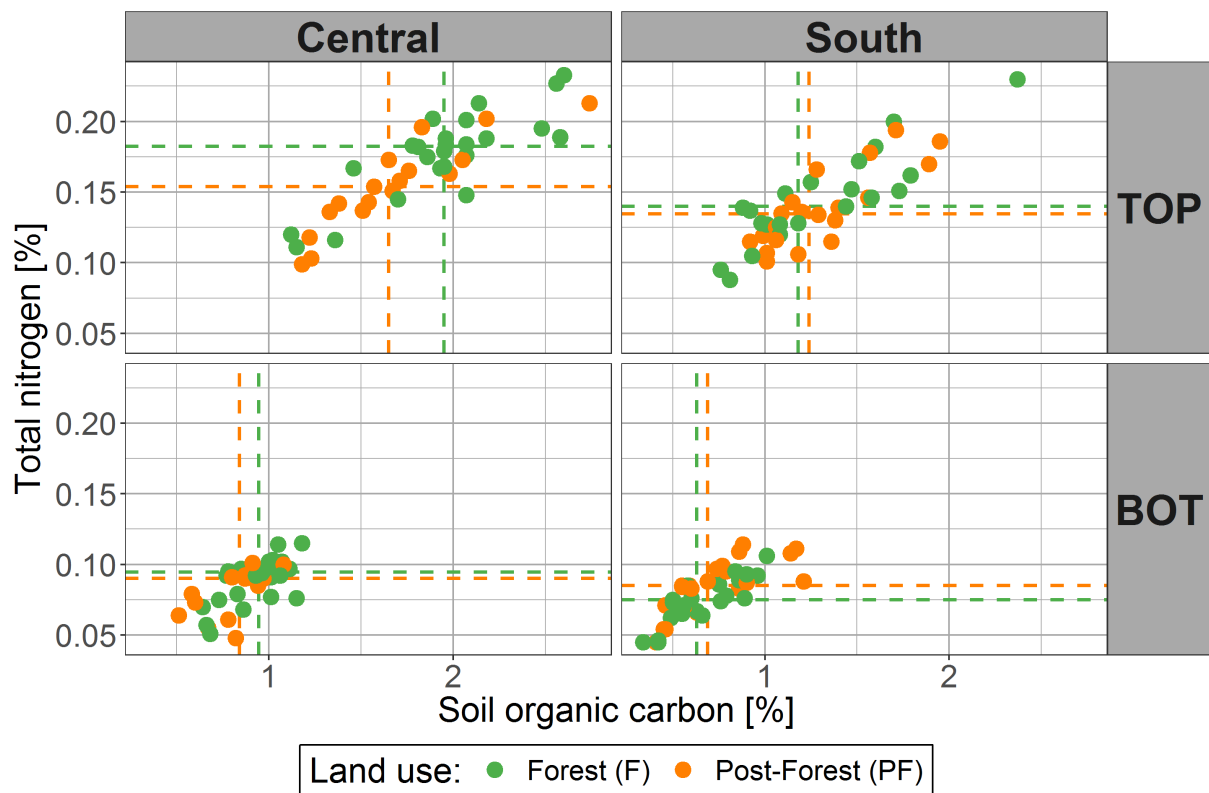

Figure 5. Total soil organic carbon and nitrogen (wt-%) in TOP and BOT samples from all ERA sites, differentiated by the central and southern locations and by forest (F) and post-forest (PF) land use

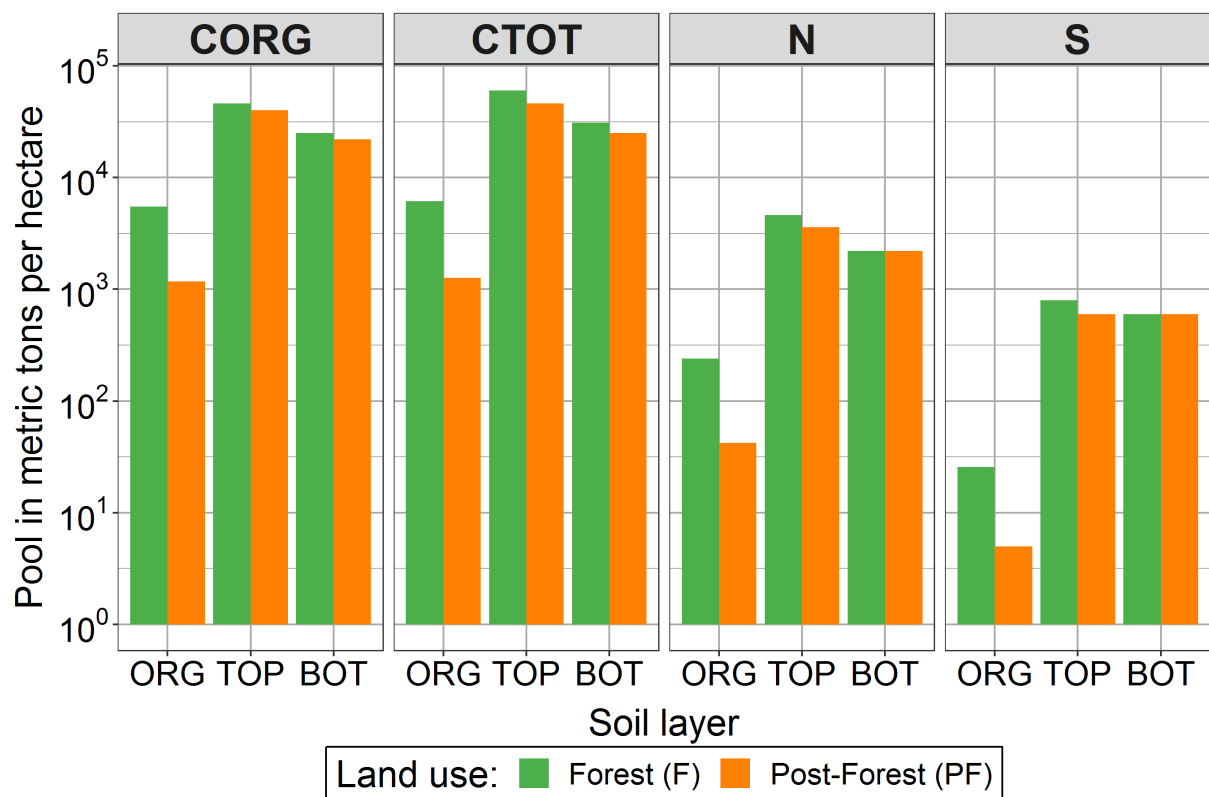

Figure 6. Average total and organic carbon (C, C<sub>org</sub>), nitrogen (N) and sulfur (S) pool sizes per hectare of Amazon Basin soil layers under forest and post-forest land cover

**Table 1. Median\* soil pH ( $\text{pH}_{\text{H}_2\text{O}}$  and  $\text{pH}_{\text{CaCl}_2}$ ) and electrical conductivities ( $\lambda$  in  $\mu\text{S cm}^{-1}$ ) in three subsequent field campaigns, representing moderately wet (Ph\_01), very dry (Ph\_02) and very wet (Ph\_03) seasons. Data are differentiated by land cover (Forest and Post-Forest)**

| Season                     | $\text{pH}_{\text{H}_2\text{O}}$ |       |       | $\text{pH}_{\text{CaCl}_2}$ |       |       | $\lambda$ ( $\mu\text{S cm}^{-1}$ ) |       |       |
|----------------------------|----------------------------------|-------|-------|-----------------------------|-------|-------|-------------------------------------|-------|-------|
|                            | Ph_01                            | Ph_02 | Ph_03 | Ph_01                       | Ph_02 | Ph_03 | Ph_01                               | Ph_02 | Ph_03 |
| TOP <sub>total</sub>       | 4.6                              | 4.2   | 4.9   | 3.9                         | 3.8   | 3.9   | 43                                  | 69    | 32    |
| TOP <sub>Forest</sub>      | 4.3                              | 4.1   | 4.8   | 3.8                         | 3.7   | 3.8   | 49                                  | 81    | 32    |
| TOP <sub>Post-Forest</sub> | 4.9                              | 4.6   | 5.2   | 4.0                         | 4.0   | 4.0   | 32                                  | 46    | 23    |
| BOT <sub>total</sub>       | 4.5                              | 4.5   | 4.6   | 3.9                         | 3.9   | 4.0   | 24                                  | 30    | 22    |
| BOT <sub>Forest</sub>      | 4.4                              | 4.3   | 4.6   | 3.8                         | 3.9   | 4.0   | 28                                  | 33    | 23    |
| BOT <sub>Post-Forest</sub> | 4.6                              | 4.6   | 4.9   | 3.9                         | 3.9   | 4.0   | 23                                  | 25    | 17    |

\*Median: average of all median values from all data sub collectives

**Table 2. Median CNS data (wt-%) for all samples (n = 85), differentiated by geographical position and land cover**

| Group           | Type | C <sub>t</sub> | C <sub>org</sub> | N    | S    | C <sub>org</sub> /N |
|-----------------|------|----------------|------------------|------|------|---------------------|
| all data        | ORG  | 42             | 38               | 1.4  | 0.17 | 27                  |
|                 | TOP  | 1.9            | 1.6              | 0.16 | 0.03 | 10                  |
|                 | BOT  | 1.0            | 0.8              | 0.08 | 0.02 | 9                   |
| all central     | ORG  | 43             | 39               | 1.6  | 0.19 | 27                  |
|                 | TOP  | 2.4            | 2.0              | 0.18 | 0.03 | 11                  |
|                 | BOT  | 1.1            | 0.9              | 0.09 | 0.03 | 10                  |
| all south       | ORG  | 41             | 37               | 1.4  | 0.16 | 30                  |
|                 | TOP  | 1.5            | 1.2              | 0.14 | 0.02 | 9                   |
|                 | BOT  | 0.8            | 0.7              | 0.08 | 0.02 | 9                   |
| all forest      | ORG  | 41             | 37               | 1.6  | 0.17 | 26                  |
|                 | TOP  | 2.3            | 1.8              | 0.17 | 0.03 | 10                  |
|                 | BOT  | 1.1            | 0.9              | 0.08 | 0.02 | 10                  |
| forest central  | ORG  | 41             | 29               | 1.6  | 0.17 | 27                  |
|                 | TOP  | 2.4            | 2.0              | 0.18 | 0.03 | 10                  |
|                 | BOT  | 1.1            | 0.9              | 0.09 | 0.03 | 10                  |
| forest south    | ORG  | 41             | 38               | 1.8  | 0.17 | 25                  |
|                 | TOP  | 1.5            | 1.2              | 0.14 | 0.02 | 9                   |
|                 | BOT  | 0.8            | 0.7              | 0.08 | 0.01 | 9                   |
| all post-forest | ORG  | 42             | 39               | 1.4  | 0.16 | 32                  |
|                 | TOP  | 1.8            | 1.5              | 0.14 | 0.02 | 11                  |
|                 | BOT  | 0.9            | 0.8              | 0.08 | 0.02 | 9                   |
| post-forest C   | ORG  | 45             | 42               | 1.8  | 0.21 | 26                  |
|                 | TOP  | 2.1            | 1.7              | 0.16 | 0.03 | 11                  |
|                 | BOT  | 1.0            | 0.8              | 0.08 | 0.02 | 10                  |
| post-forest S   | ORG  | 41             | 37               | 1.2  | 0.14 | 32                  |
|                 | TOP  | 1.5            | 1.2              | 0.13 | 0.02 | 9                   |
|                 | BOT  | 0.9            | 0.7              | 0.08 | 0.02 | 8                   |

Data rounded for clarity. Detailed values (all meaningful digits) in electronic supplement

**Table 3. Median values for carbon (C<sub>t</sub> and C<sub>org</sub>), total nitrogen (N) and total sulfur (S) in upper continental crust (UCC), World Soil Averages (WSA), global ferralsols (WISE30sec), in European TOP and BOT mineral soil (FOREGS and GEMAS) and in Amazon basin upland (terra firme) ferralsols (TOP, BOT) with forest (F) and post-forest (PF) land cover**

| (wt-%)        | C <sub>t</sub>   | C <sub>org</sub> | N                 | S    |
|---------------|------------------|------------------|-------------------|------|
| UCC           | 0.32             | n.d.             | 0.008             | 0.06 |
| WSA           | n.d.             | n.d.             | n.d.              | 0.08 |
| WISE30sec TOP | n.d.             | 1.7              | 0.15              | n.d. |
| WISE30sec BOT | n.d.             | 1.0              | 0.10              | n.d. |
| FOREGS TOP    | 2.2 <sup>#</sup> | 1.7              | 0.17 <sup>#</sup> | 0.02 |
| FOREGS BOT    | n.d.             | 0.4              | n.d.              | 0.01 |
| F-TOP         | 2.2              | 1.8              | 0.17              | 0.03 |
| F-BOT         | 1.0              | 0.9              | 0.08              | 0.02 |
| PF-TOP        | 1.8              | 1.4              | 0.14              | 0.02 |
| PF-BOT        | 0.9              | 0.8              | 0.08              | 0.02 |

All values rounded for clarity. "n.d.": not determined. "F": forest, "PF": post-forest. UCC data: Rudnick and Gao (2014). WSA and total carbon in UCC: Reimann and de Caritat (1998); WISE30sec data for global ferralsols, TOP = 0–20 cm, BOT = 20–40 cm: Batjes (2016) and <https://www.isric.org/explore/wise-databases>; FOREGS data: Salminen (2005), #C and N data: Matschullat et al. (2018), based on the GEMAS project (Reimann et al., 2014)

**Table 4. Wet season – dry season dynamics in CNS data (relative percentage change), differentiated by geographical position (C = central, S = south) and land cover (forest and post-forest)**

|       |                  | Median values all sites in wt.-%* |       |       | Wet to dry season |             |
|-------|------------------|-----------------------------------|-------|-------|-------------------|-------------|
|       | component        | Ph_01*                            | Ph_02 | Ph_03 | forest            | post-forest |
| ORG-C | C <sub>t</sub>   | 41.6                              | 41.7  | 46.6  | - 9%              | - 13%       |
|       | N                | 1.35                              | 1.49  | 1.80  | - 21%             | - 17%       |
|       | S                | 0.201                             | 0.172 | 0.194 | - 8%              | - 14%       |
| ORG-S | C <sub>t</sub>   | 40.6                              | 40.8  | 43.3  | - 10%             | - 5%        |
|       | N                | 1.38                              | 1.07  | 1.57  | - 18%             | - 29%       |
|       | S                | 0.158                             | 0.129 | 0.169 | - 9%              | - 27%       |
| TOP-C | C <sub>t</sub>   | 2.12                              | 2.50  | 2.31  | + 10%             | + 3%        |
|       | C <sub>org</sub> | 1.47                              | 1.95  | 2.05  | + 5%              | - 6%        |
|       | N                | 0.159                             | 0.165 | 0.184 | - 2%              | - 4%        |
|       | S                | 0.032                             | 0.029 | 0.030 | - 12%             | + 4%        |
| TOP-S | C <sub>t</sub>   | 1.52                              | 1.81  | 1.45  | + 35%             | + 7%        |
|       | C <sub>org</sub> | 1.10                              | 1.40  | 1.18  | + 36%             | - 3%        |
|       | N                | 0.135                             | 0.143 | 0.136 | + 15%             | - 4%        |
|       | S                | 0.023                             | 0.021 | 0.021 | + 5%              | - 8%        |
| BOT-C | C <sub>t</sub>   | 0.86                              | 1.11  | 1.05  | + 10%             | ± 0%        |
|       | C <sub>org</sub> | 0.68                              | 0.94  | 0.95  | + 3%              | + 8%        |
|       | N                | 0.075                             | 0.093 | 0.092 | + 5%              | + 8%        |
|       | S                | 0.019                             | 0.036 | 0.028 | + 12%             | + 58%       |
| BOT-S | C <sub>t</sub>   | 0.83                              | 0.99  | 0.87  | + 13%             | + 6%        |
|       | C <sub>org</sub> | 0.60                              | 0.78  | 0.67  | + 13%             | + 1%        |
|       | N                | 0.073                             | 0.085 | 0.081 | + 13%             | + 8%        |
|       | S                | 0.015                             | 0.018 | 0.016 | + 24%             | ± 0%        |

\*The individual campaigns returned with slightly different numbers of samples: Ph\_01: ORG-C 9, ORG-S 14; TOP-C 10, TOP-S 14; BOT-C 10, BOT-S 14; Ph\_02: ORG-C 14, ORG-S 13; TOP-C 15, TOP-S 13; BOT-C 15, BOT-S 14; Ph\_03: ORG-C 15, ORG-S 10; TOP-C 15, TOP-S 12; BOT-C 15, BOT-S 12. Phase 01 was excluded from the intra-annual calculation, since it was an untypical, ENSO-driven, weak wet season.

**Table 5. Nutrient element stocks (in kilograms) in the three pools of litter (ORG), mineral topsoil (TOP: 0–20 cm) and deeper mineral soil (BOT: 20–50 cm), differentiated by forest and post-forest land cover. Values present total stocks per hectare, calculated from the median data in Tables 2–4**

|                  | ORG    |             | TOP    |             | BOT    |             |
|------------------|--------|-------------|--------|-------------|--------|-------------|
|                  | Forest | Post-Forest | Forest | Post-Forest | Forest | Post-Forest |
| C <sub>t</sub>   | 6150   | 1260        | 60000  | 46000       | 31000  | 25000       |
| C <sub>org</sub> | 5550   | 1170        | 46000  | 40000       | 25000  | 22000       |
| N                | 240    | 42          | 4600   | 3600        | 2200   | 2200        |
| S                | 25.5   | 5           | 800    | 600         | 600    | 600         |

All values rounded for clarity

## Electronic supplement

**Table A01.** Average values for temperature and accumulated precipitation versus the climate normal 1961–1990 (CN\_6190); based on eight INMET meteorological stations in Amazonas

| Maximum temperature (°C)               |              |              |              |              |              |              |                     |              |
|----------------------------------------|--------------|--------------|--------------|--------------|--------------|--------------|---------------------|--------------|
| <b>FEB</b>                             | Barcelos     | Fonte Boa    | Itacoatiara  | Lábrea       | Manaus       | Manicoré     | S.G. Cach. (Uaupés) | Tefé         |
| 2016                                   | 34.7         | 32.6         | 31.7         |              |              | 33.3         | 34.0                | 33.7         |
| 2017                                   | 34.0         | 31.1         | 30.5         | 32.0         | 31.0         | 31.5         | 33.9                | 31.7         |
| CN_6190                                | <b>31.9</b>  | <b>31.1</b>  | <b>30.5</b>  | <b>29.1</b>  | <b>30.4</b>  | <b>30.5</b>  | <b>31.0</b>         | <b>31.2</b>  |
| <b>MAR</b>                             | Barcelos     | Fonte Boa    | Itacoatiara  | Lábrea       | Manaus       | Manicoré     | S.G. Cach. (Uaupés) | Tefé         |
| 2016                                   | 33.1         | 32.2         | 31.5         |              |              | 32.7         | 33.7                | 31.6         |
| 2017                                   | 33.8         | 31.1         | 30.8         | 32.3         | 31.4         | 32.3         | 33.4                | 31.0         |
| CN_6190                                | <b>31.9</b>  | <b>30.7</b>  | <b>30.1</b>  | <b>30.9</b>  | <b>30.6</b>  | <b>31.0</b>  | <b>30.8</b>         | <b>31.3</b>  |
| <b>JUL</b>                             | Barcelos     | Fonte Boa    | Itacoatiara  | Lábrea       | Manaus       | Manicoré     | S.G. Cach. (Uaupés) | Tefé         |
| 2016                                   | 34.0         | 31.7         | 33.1         | 34.9         | 33.4         | 35.2         | 31.8                | 32.7         |
| CN_6190                                | <b>31.1</b>  | <b>30.1</b>  | <b>31.1</b>  | <b>31.9</b>  | <b>31.3</b>  | <b>32.0</b>  | <b>29.2</b>         | <b>31.1</b>  |
| <b>AUG</b>                             | Barcelos     | Fonte Boa    | Itacoatiara  | Lábrea       | Manaus       | Manicoré     | S.G. Cach. (Uaupés) | Tefé         |
| 2016                                   |              | 33.6         | 33.8         | 35.3         | 34.4         | 35.7         | 33.4                | 34.3         |
| CN_6190                                | <b>31.6</b>  | <b>31.1</b>  | <b>32.0</b>  | <b>32.5</b>  | <b>32.6</b>  | <b>33.2</b>  | <b>30.3</b>         | <b>31.9</b>  |
| Minimum temperature (°C)               |              |              |              |              |              |              |                     |              |
| <b>FEB</b>                             | Barcelos     | Fonte Boa    | Itacoatiara  | Lábrea       | Manaus       | Manicoré     | S.G. Cach. (Uaupés) | Tefé         |
| 2016                                   | 24.6         | 22.9         | 24.7         | 23.8         | 25.4         | 24.1         | 23.2                | 24.2         |
| 2017                                   | 23.3         | 22.9         | 23.6         | 23.2         | 24.5         | 23.7         | 20.3                | 23.7         |
| CN-6190                                | <b>22.1</b>  | <b>22.4</b>  | <b>22.0</b>  | <b>20.7</b>  | <b>23.1</b>  | <b>22.0</b>  | <b>22.6</b>         | <b>22.9</b>  |
| <b>MAR</b>                             | Barcelos     | Fonte Boa    | Itacoatiara  | Lábrea       | Manaus       | Manicoré     | S.G. Cach. (Uaupés) | Tefé         |
| 2016                                   | 23.4         | 22.5         | 24.3         | 24.0         | 25.4         | 24.2         | 22.9                | 24.2         |
| 2017                                   | 23.1         | 22.8         | 23.8         | 23.4         | 24.5         | 24.0         | 20.1                | 24.0         |
| CN-6190                                | <b>22.2</b>  | <b>22.5</b>  | <b>22.3</b>  | <b>21.0</b>  | <b>23.2</b>  | <b>22.3</b>  | <b>22.6</b>         | <b>22.9</b>  |
| <b>JUL</b>                             | Barcelos     | Fonte Boa    | Itacoatiara  | Lábrea       | Manaus       | Manicoré     | S.G. Cach. (Uaupés) | Tefé         |
| 2016                                   | 23.4         | 22.4         | 23.9         | 21.1         | 25.1         | 22.9         | 20.7                | 24.0         |
| CN-6190                                | <b>21.5</b>  | <b>21.5</b>  | <b>21.8</b>  | <b>19.0</b>  | <b>22.7</b>  | <b>21.2</b>  | <b>21.6</b>         | <b>21.9</b>  |
| <b>AUG</b>                             | Barcelos     | Fonte Boa    | Itacoatiara  | Lábrea       | Manaus       | Manicoré     | S.G. Cach. (Uaupés) | Tefé         |
| 2016                                   | 23.3         | 23.0         | 24.3         | 21.8         | 25.7         | 23.3         | 20.6                | 24.0         |
| CN-6190                                | <b>21.5</b>  | <b>21.6</b>  | <b>21.9</b>  | <b>19.3</b>  | <b>23.0</b>  | <b>21.5</b>  | <b>21.7</b>         | <b>22.3</b>  |
| Corrected average temperature (°C)     |              |              |              |              |              |              |                     |              |
| <b>FEB</b>                             | Barcelos     | Fonte Boa    | Itacoatiara  | Lábrea       | Manaus       | Manicoré     | S.G. Cach. (Uaupés) | Tefé         |
| 2016                                   | 28.2         | 27.3         | 27.9         | 28.3         | 28.2         | 27.2         | 27.3                | 27.3         |
| 2017                                   | 27.1         | 27.4         | 26.7         | 26.6         | 26.8         | 26.3         | 26.1                | 26.9         |
| CN-6190                                | <b>26.3</b>  | <b>25.9</b>  | <b>25.8</b>  | <b>25.5</b>  | <b>25.9</b>  | <b>25.8</b>  | <b>26.1</b>         | <b>26.1</b>  |
| <b>MAR</b>                             | Barcelos     | Fonte Boa    | Itacoatiara  | Lábrea       | Manaus       | Manicoré     | S.G. Cach. (Uaupés) | Tefé         |
| 2016                                   | 27.3         | 27.2         | 27.5         |              | 27.9         | 27.1         | 27.1                | 27.1         |
| 2017                                   | 27.1         | 27.4         | 27.0         | 26.6         | 27.0         | 26.8         | 25.8                | 26.7         |
| CN-6190                                | <b>26.3</b>  | <b>25.5</b>  | <b>25.9</b>  | <b>26.0</b>  | <b>26.0</b>  | <b>26.1</b>  | <b>26.0</b>         | <b>26.2</b>  |
| <b>JUL</b>                             | Barcelos     | Fonte Boa    | Itacoatiara  | Lábrea       | Manaus       | Manicoré     | S.G. Cach. (Uaupés) | Tefé         |
| 2016                                   | 27.6         | 26.3         | 28.4         | 26.9         | 28.7         | 28.0         | 25.2                | 27.5         |
| CN-6190                                | <b>25.4</b>  | <b>24.8</b>  | <b>26.2</b>  | <b>25.0</b>  | <b>26.5</b>  | <b>26.1</b>  | <b>24.7</b>         | <b>25.8</b>  |
| <b>AUG</b>                             | Barcelos     | Fonte Boa    | Itacoatiara  | Lábrea       | Manaus       | Manicoré     | S.G. Cach. (Uaupés) | Tefé         |
| 2016                                   | 27.6         | 27.3         | 28.7         | 27.3         | 29.4         | 28.0         | 26.0                | 28.2         |
| CN-6190                                | <b>25.7</b>  | <b>25.4</b>  | <b>26.7</b>  | <b>25.5</b>  | <b>27.3</b>  | <b>26.7</b>  | <b>25.2</b>         | <b>26.3</b>  |
| Accumulated monthly precipitation (mm) |              |              |              |              |              |              |                     |              |
| <b>FEB</b>                             | Barcelos     | Fonte Boa    | Itacoatiara  | Lábrea       | Manaus       | Manicoré     | S.G. Cach. (Uaupés) | Tefé         |
| 2016                                   | 53.5         | 284          | 402.4        | 304.2        | 235.3        | 256          | 157.9               | 226.0        |
| 2017                                   | 162.7        | 267.1        | 377.5        | 328          | 257.4        | 390.9        | 441.2               | 317.9        |
| CN-6190                                | <b>174.0</b> | <b>200.3</b> | <b>294.9</b> | <b>370.4</b> | <b>289.5</b> | <b>367.9</b> | <b>231.8</b>        | <b>244.7</b> |
| <b>MAR</b>                             | Barcelos     | Fonte Boa    | Itacoatiara  | Lábrea       | Manaus       | Manicoré     | S.G. Cach. (Uaupés) | Tefé         |
| 2016                                   | 109.8        | 175.4        | 628.9        | 295.2        | 281.9        | 391.2        | 311.8               | 408.3        |
| 2017                                   | 98.4         | 291.6        | 578.9        | 197          | 270          | 213.6        | 285.1               | 173.4        |
| CN-6190                                | <b>274.2</b> | <b>265.9</b> | <b>348.0</b> | <b>371.8</b> | <b>335.4</b> | <b>293.5</b> | <b>241.7</b>        | <b>301.3</b> |
| <b>JUL</b>                             | Barcelos     | Fonte Boa    | Itacoatiara  | Lábrea       | Manaus       | Manicoré     | S.G. Cach. (Uaupés) | Tefé         |
| 2016                                   | 63           | 189.2        | 132.7        | 9.8          | 103.2        | 4.5          | 267.3               | 166.8        |
| CN-6190                                | <b>198.5</b> | <b>175.7</b> | <b>129.5</b> | <b>45.7</b>  | <b>85.4</b>  | <b>74.7</b>  | <b>247.6</b>        | <b>124.5</b> |
| <b>AUG</b>                             | Barcelos     | Fonte Boa    | Itacoatiara  | Lábrea       | Manaus       | Manicoré     | S.G. Cach. (Uaupés) | Tefé         |
| 2016                                   | 75           | 88.8         | 79.3         | 5.7          | 49.8         | 54.4         | 142.7               | 59.5         |
| CN-6190                                | <b>155.8</b> | <b>153.4</b> | <b>82.8</b>  | <b>83.7</b>  | <b>47.3</b>  | <b>75.5</b>  | <b>193.7</b>        | <b>101.3</b> |

583  
584

585
